# Supplementary material
Source: PubMed Central journal article supplement (PMC4725508)
Supplement: pnas.1516122113.sapp.pdf [file pnas.1516122113.sapp.pdf]

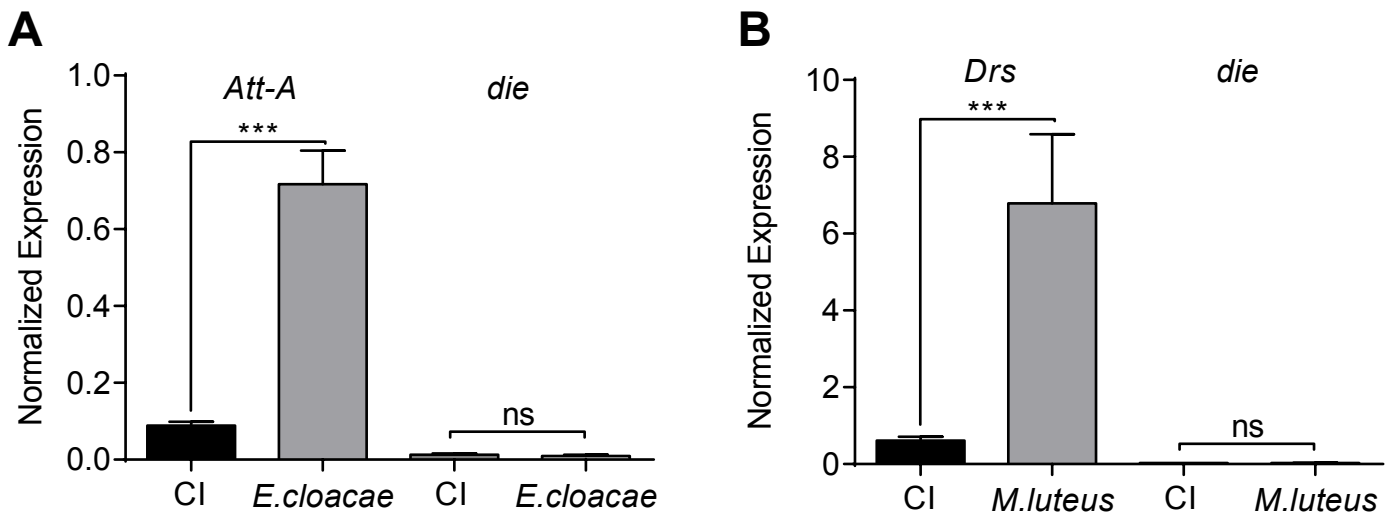

**Figure S1: *die* is not induced after infection by *E. cloacae* and *M. luteus* bacteria.**

(A, B) Wild-type flies were challenged with the Gram-negative bacteria *E. cloacae* (A) or the Gram positive bacteria *M. luteus* (B), and expression of *die*, *Attacin-A* (an IMD target gene) and *Drosomycin* (a Toll target gene) mRNA was assayed by qRT-PCR at 6h (A) or 24h (B) post-infection. Data represent the mean and s.d. of three independent experiments each containing three groups of 6 flies. t-test: ns  $p > 0.05$ , \*\*\*  $p < 0.001$ . CI: clean injury.

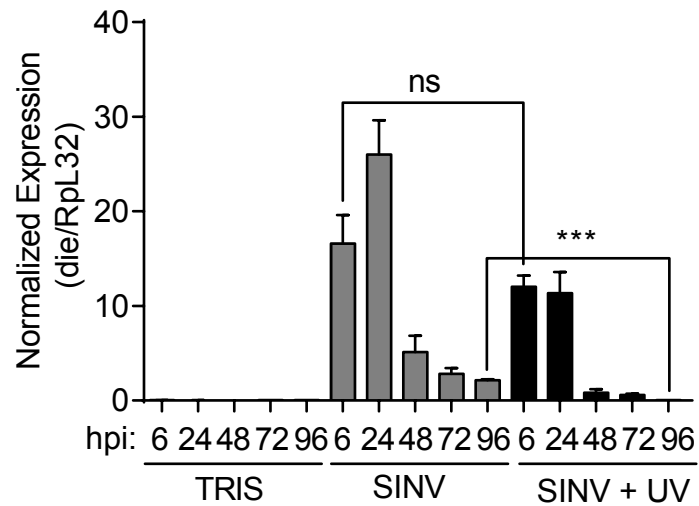

**Figure S2: Rapid induction of *die* does not require infectious Sindbis virus.**

Wild-type flies were infected with either SINV or UV-inactivated SINV (2500 PFU) and *die* mRNA levels were monitored by qRT-PCR at the indicated timepoints. Mean and s.d. of two independent experiments, each containing three groups of 6 flies, is shown. t-test : ns  $p > 0.05$ , \*\*\*  $p < 0.001$ . hpi: hours post-injection. Note that the difference between live and UV-inactivated SINV becomes statistically significant at late time points.

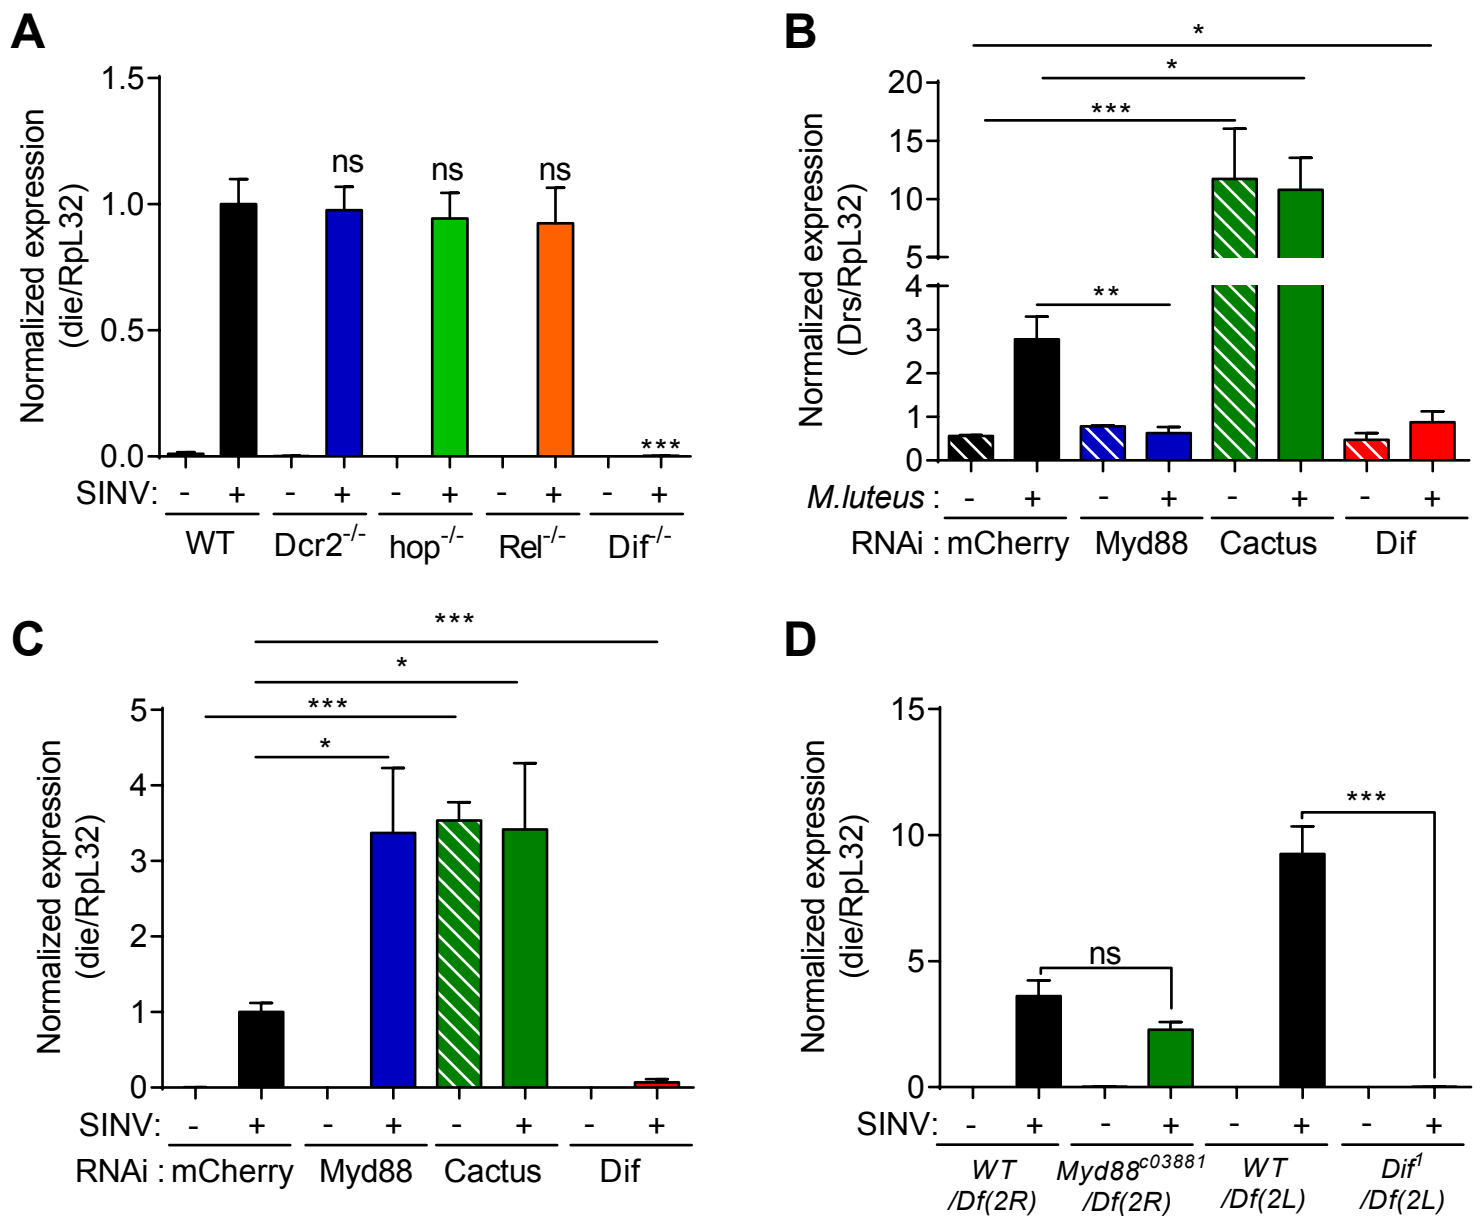

**Figure S3: Induction of *die* requires the NF-kappaB transcription factor *Dif* but not *Myd88***

(A) The mutant flies *Dcr2*<sup>L81fsX</sup> (*Dcr2*<sup>-/-</sup>), *hop*<sup>msv1/M38</sup> (*hop*<sup>-/-</sup>), *Rel*<sup>E20</sup> (*Rel*<sup>-/-</sup>) and *Dif*<sup>1</sup> (*Dif*<sup>-/-</sup>) were injected with TRIS (-) or SINV (+). The expression level of *die* mRNA was determined using qRT-PCR at 1 dpi. (B and C) Flies expressing dsRNA (*act-GAL4;UAS-dsRNA*) against *mCherry*, *Myd88*, *Cactus* and *Dif* genes were infected by *M.luteus* (B) or SINV (C). The expression level of *Drosomycin* (*Drs*) (B) or *die* mRNA (C) was determined using qRT-PCR. (D) Hemizygotes flies expressing one (*WT/Df(2R)*) and *WT/Df(2L)* or zero copy of the *Myd88* (*Myd88*<sup>c03881</sup>/*Df(2R)*) or *Dif* (*Dif*<sup>1</sup>/*Df(2L)*) gene were injected with TRIS (-) or SINV (+). The deficiencies covering *Myd88* and *Dif* genes are *Df(2R)BSC279* and *Df(2L)Exel7068*, respectively. The expression level of *die* mRNA was determined using qRT-PCR at 1 dpi. Data represent the mean and s.d. of three independent experiments, each containing three groups of 6 flies. t-test: ns  $p > 0.05$ , \*  $p < 0.05$ , \*\*  $p < 0.01$ , \*\*\*  $p < 0.001$ .

A

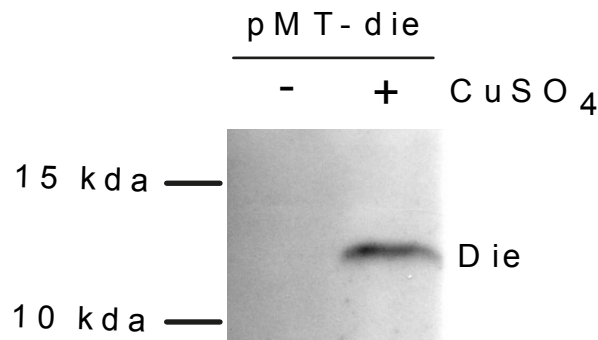

B

| Die homolog from:                           | Name            | ID:                 |
|---------------------------------------------|-----------------|---------------------|
| <i>Pseudaletia unipuncta granulovirus</i>   | ORF109          | YP_003422448.1      |
| <i>Helicoverpa armigera granulovirus</i>    | HaGV_gp108      | YP_001649090.1      |
| <i>Xestia c-nigrum granulovirus</i>         | ORF106          | NP_059254.1         |
| <i>Spodoptera frugiperda ascovirus 1a</i>   | ORF121          | YP_762476.1         |
| <i>Heliothis virescens ascovirus 3e</i>     | HVAV3e_gp095    | YP_001110948        |
| <i>Mythimna separata entomopoxvirus 'L'</i> | MYSEV_165       | YP_008003682.1      |
| <i>Leptopilina heterotoma</i>               | comp202_c0_seq1 | Goecks et al., 2013 |
| <i>Leptopilina boulardi</i>                 | comp479_c0_seq1 | Goecks et al., 2013 |

C

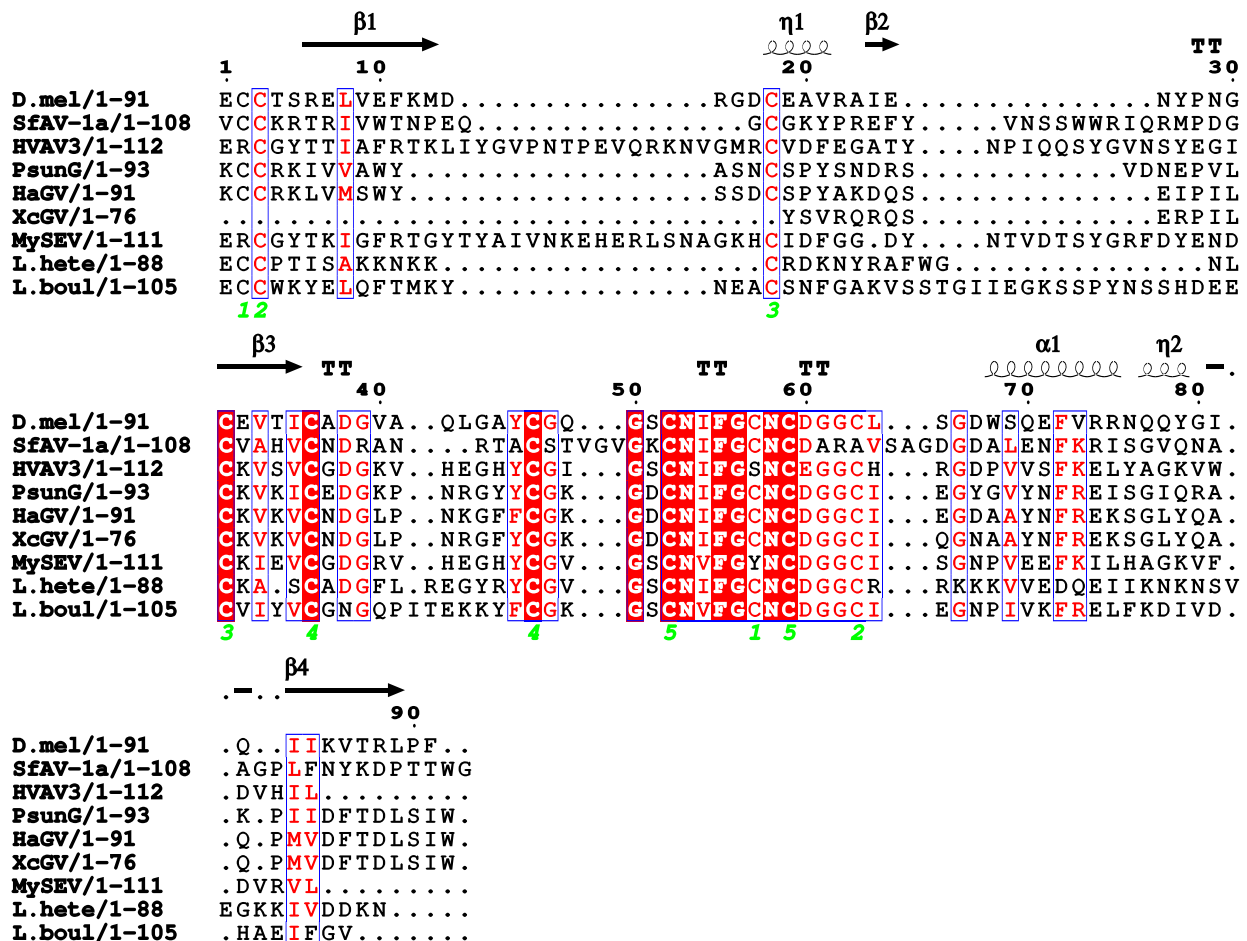

Figure S4

(A) The C-terminally V5 tagged Die protein is detected by Western blot with anti-V5 antibodies in the supernatant of S2 cells transfected with a metallothionein driven vector expressing the *die* cDNA. (B) The table indicates the origin, name and reference sequence for Die homologs. (C) The Die protein of *Drosophila melanogaster* was aligned to homologous gene products from *Spodoptera frugiperda ascovirus* (SfAV-1a), *Heliothis virescens ascovirus 3e* (HVAV3), *Pseudaletia unipuncta granulovirus* (PsunG), *Helicoverpa armigera granulovirus* (HaGV), *Xestia c-nigrum granulovirus* (XcGV), *Mythimna separata entomopoxvirus L* (MySEV), *Leptopilina boulardi* (L.boul) and *Leptopilina heterotoma* (L.hete). Secondary structure elements as determined in *Drosophila* Die, are indicated below the sequences as arrows and helices, respectively. Conserved residues are boxed, and strictly conserved residues are shown in white with a red background. The figure was generated with ESPript (Gouet et al., 2003)

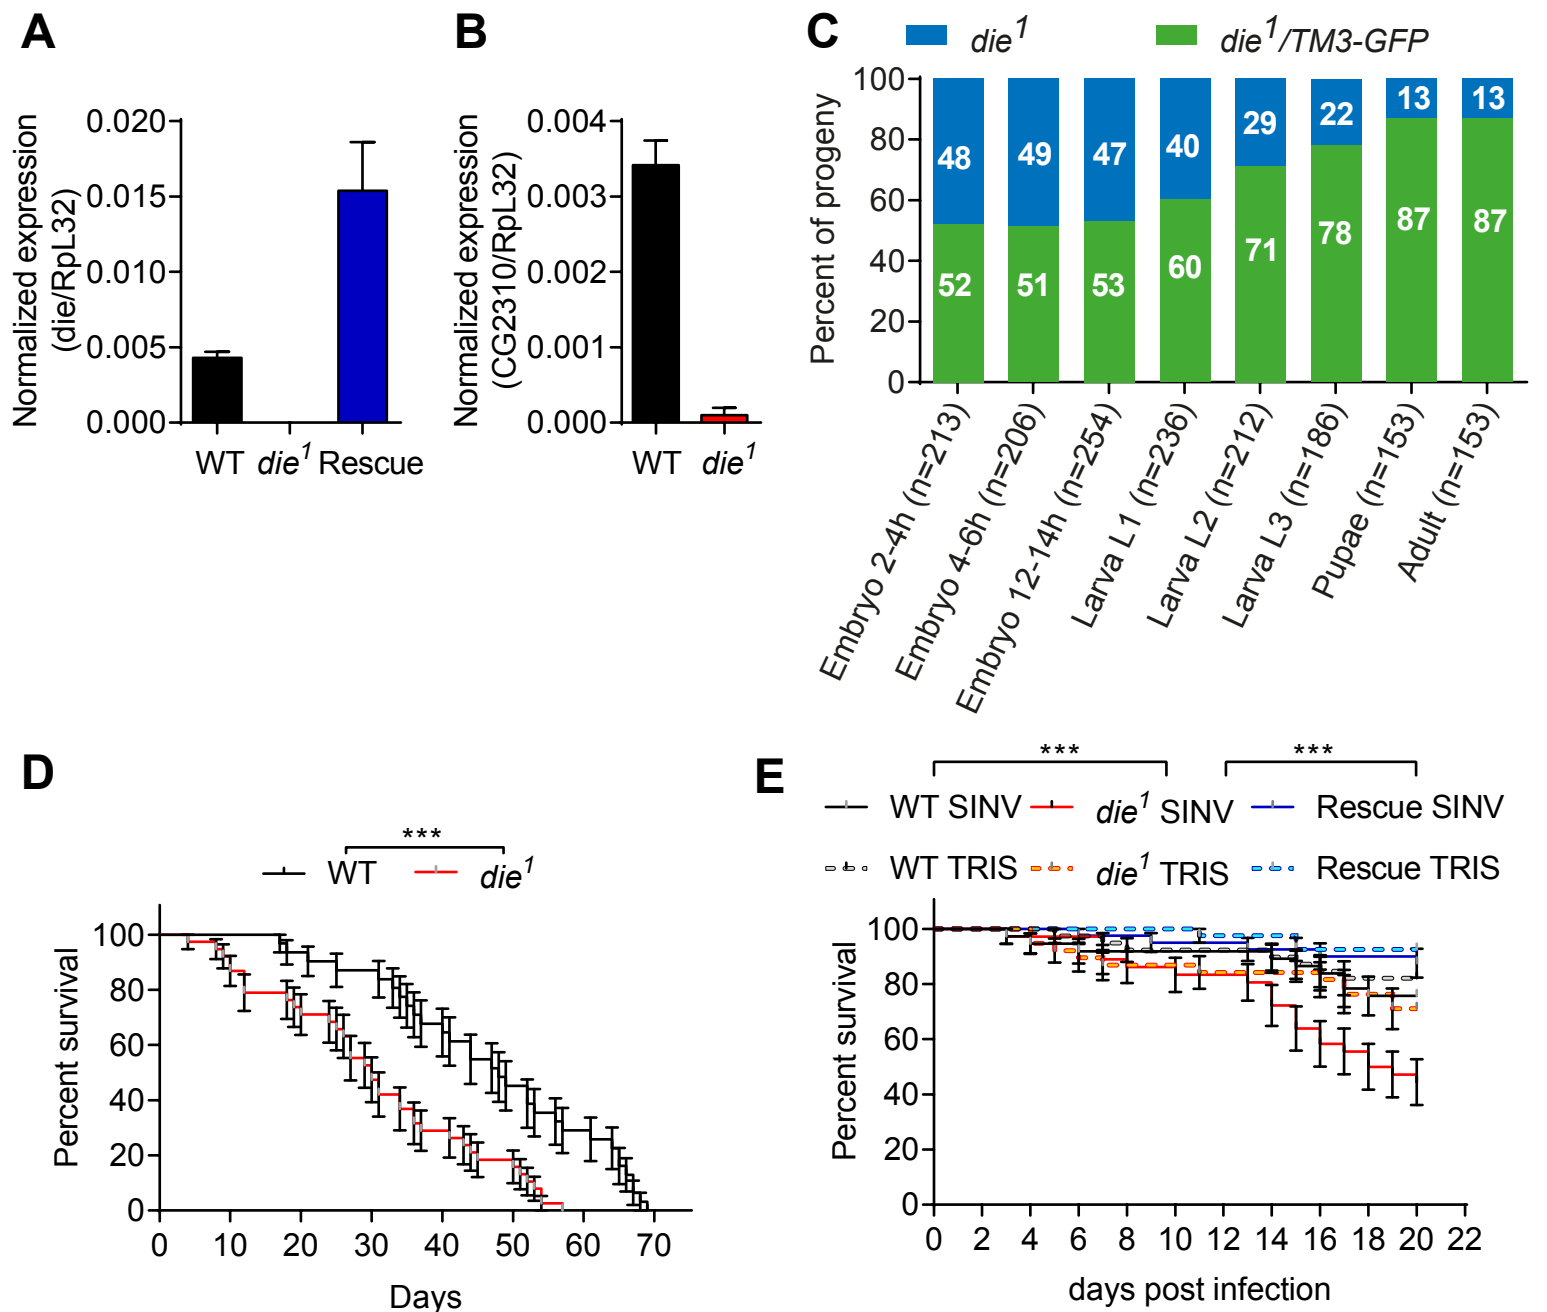

**Figure S5: *die* is required for viability during developments and in adults.**

(A and B) mRNA levels for *die* and CG2310 were monitored by qPCR in wild-type, *die*<sup>1</sup> mutant and Rescue (*act-GAL4; UAS-die, die*<sup>1</sup>) flies. (C) Homozygous *die*<sup>1</sup> mutant males were crossed to heterozygous *die*<sup>1</sup>/TM3-GFP females, generating 50% of *die*<sup>1</sup> homozygous embryos and 50% of heterozygous embryos expressing the GFP balancer chromosome. The ratio between homozygous and heterozygous progeny was followed throughout development at 25°C. Data represent the mean of 2 independent experiments and the total number of individuals monitored is indicated. (D) The lifespan of wild-type and *die*<sup>1</sup> flies was measured daily at 25°C. (E) Flies of the indicated genotype were injected with Tris, SINV and survival was monitored daily at 25°C. Data represent the mean and s.d. (A and B) or s.e (D and E) of 3 independent experiments, each containing 3 groups of 10 (D and E) or 6 (A and B) flies. Log rank test: \*\*\* indicate that  $p < 0.001$ .

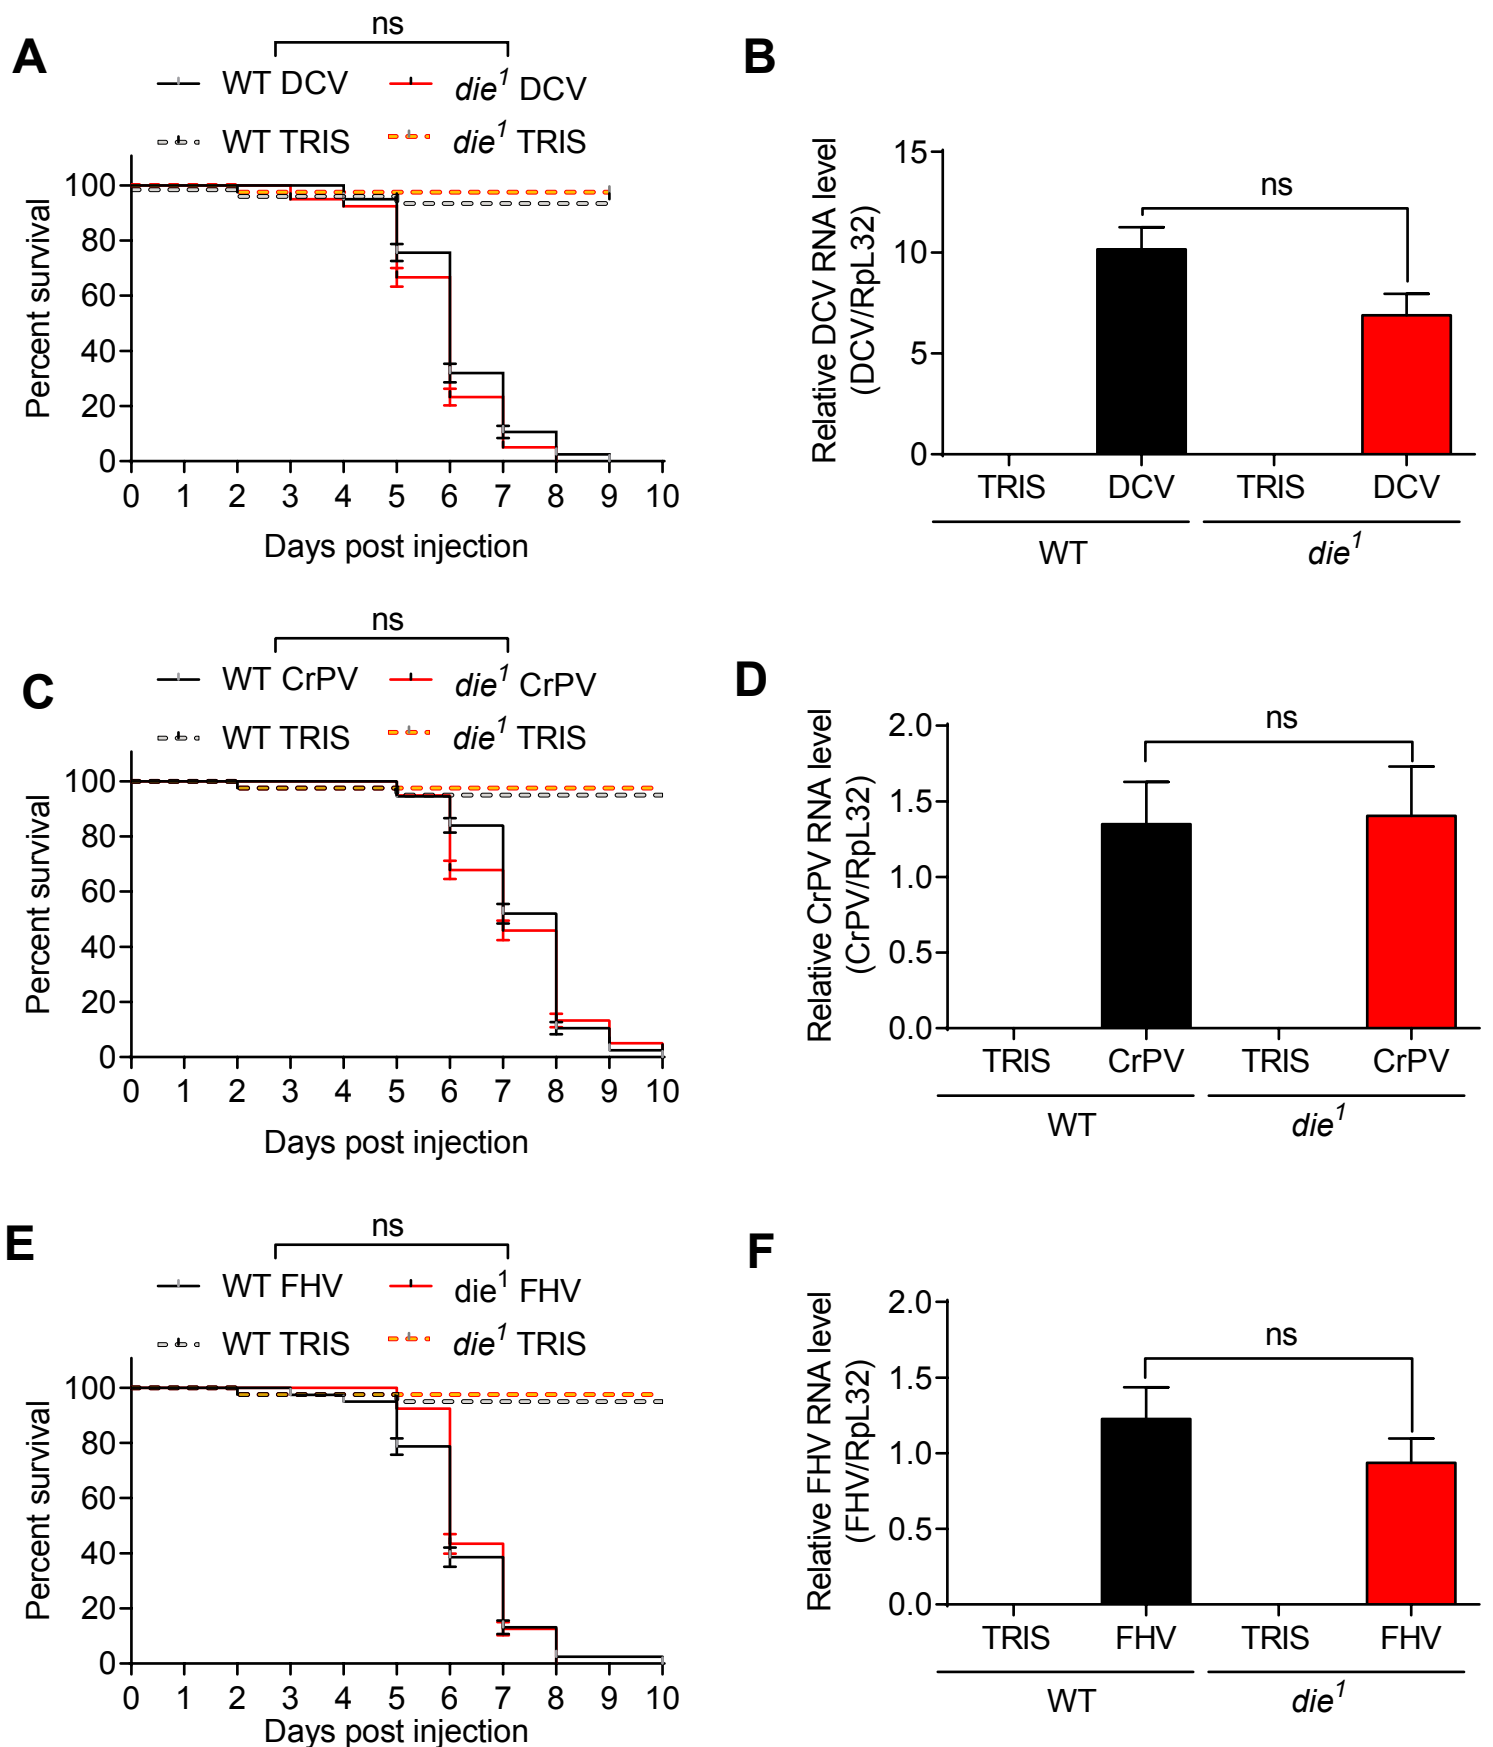

**Figure S6: *die*<sup>1</sup> mutant flies are not sensitive to DCV, CrPV and FHV.**

(A, C, E) Flies of the indicated genotype were injected with TRIS, DCV (A), CrPV (C) or FHV (E) and survival was monitored daily at 25°C. (B, D, F) Analysis of the accumulation of DCV (B), CrPV (D) and FHV (F) RNA in wild-type and *die*<sup>1</sup> mutants at 3 dpi. Data represent the mean and s.e. (A, C, E) or s.d. (B, D, F) of 3 independent experiments, each containing 3 groups of 10 (A, C, E) or 6 (B, D, F) flies. Log rank (A, C, E) and t test (B, D, F): ns indicates that  $p > 0.05$ .

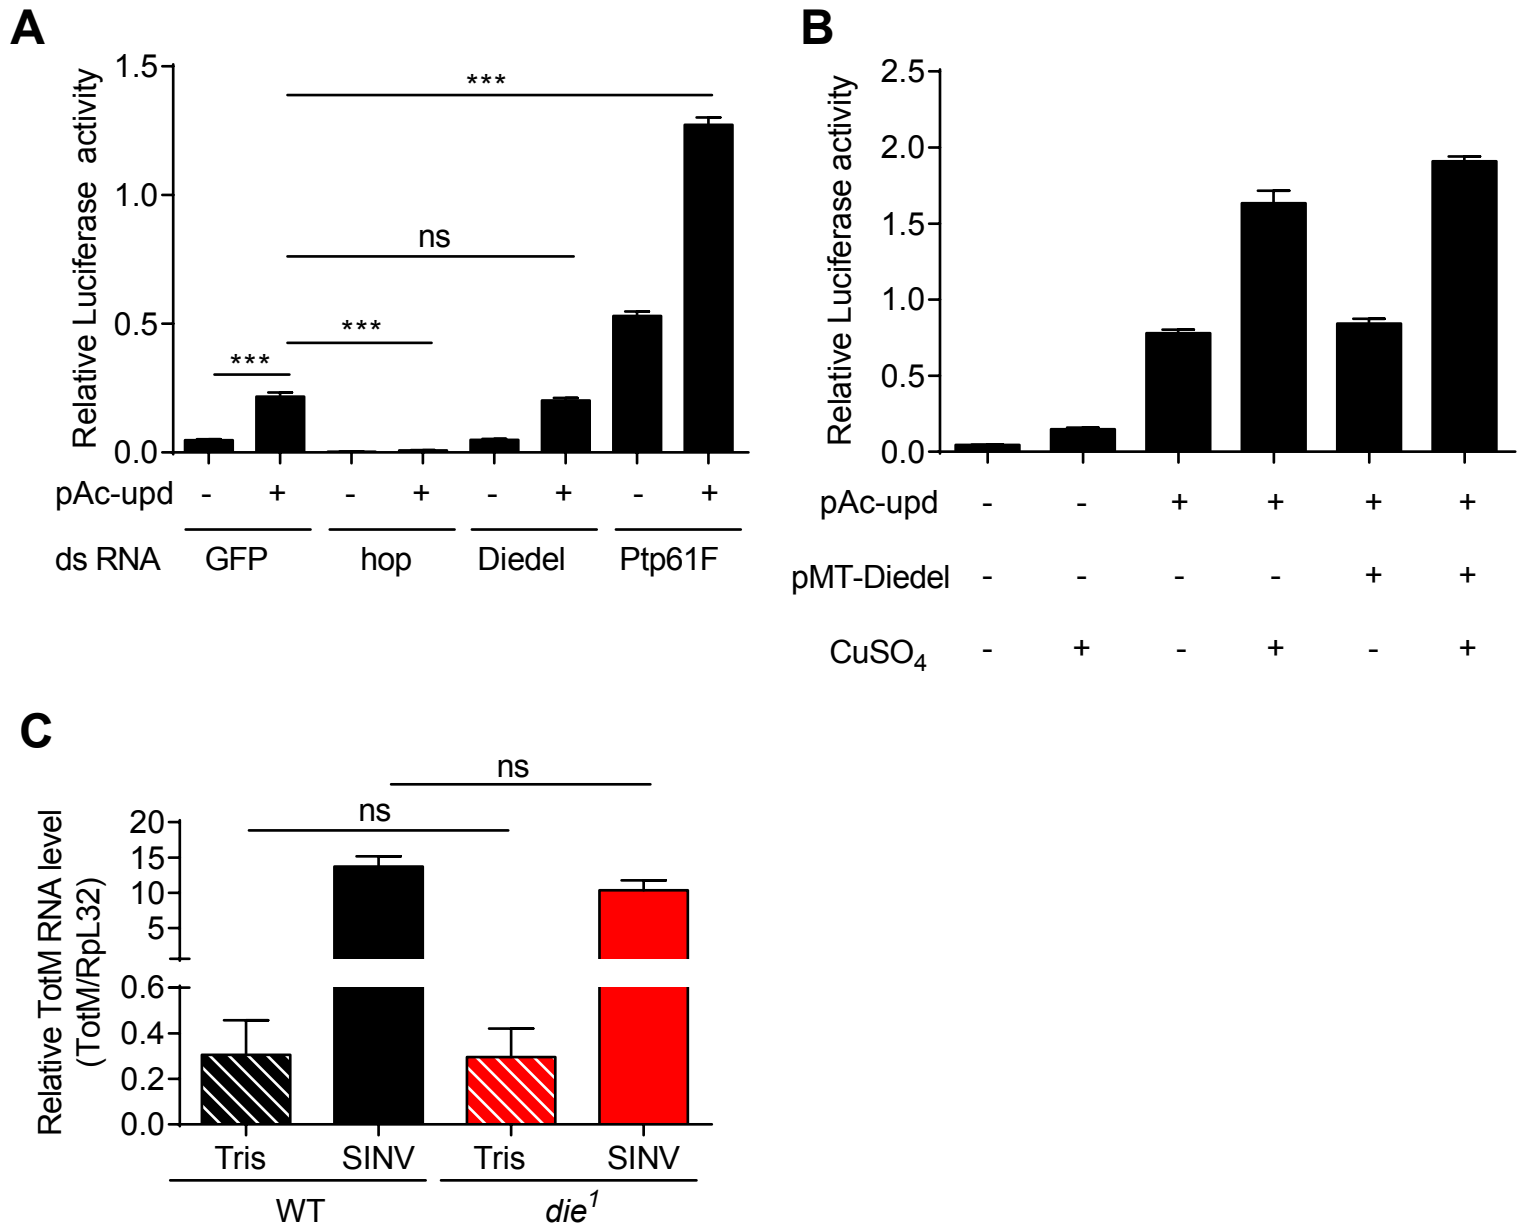

**Figure S7: *die* is not a negative regulator of the JAK/STAT pathway.**

(A and B) S2 cells were co-transfected with the *Turandot M* (*TotM*) Luciferase reporter and the pAC-upd plasmid. (A) dsRNA against *hopsctoch* (*hop*) or *Ptp61F*, but not *die*, significantly affects the induction of the Luciferase by *Upd*. (B) S2 cells were also co-transfected the pMT-*die* plasmid. CuSO<sub>4</sub> were added in order to induce the expression of Die protein. (C) Analysis of the relative TotM RNA level in wild-type and *die*<sup>1</sup> mutant flies 24 hours post injection. Data represent the mean and s.d. of 3 independent experiments, each containing 3 groups of 6 flies (C). t test (A, C): ns indicate that  $p > 0.05$ , \*\*\*  $p < 0.001$ .

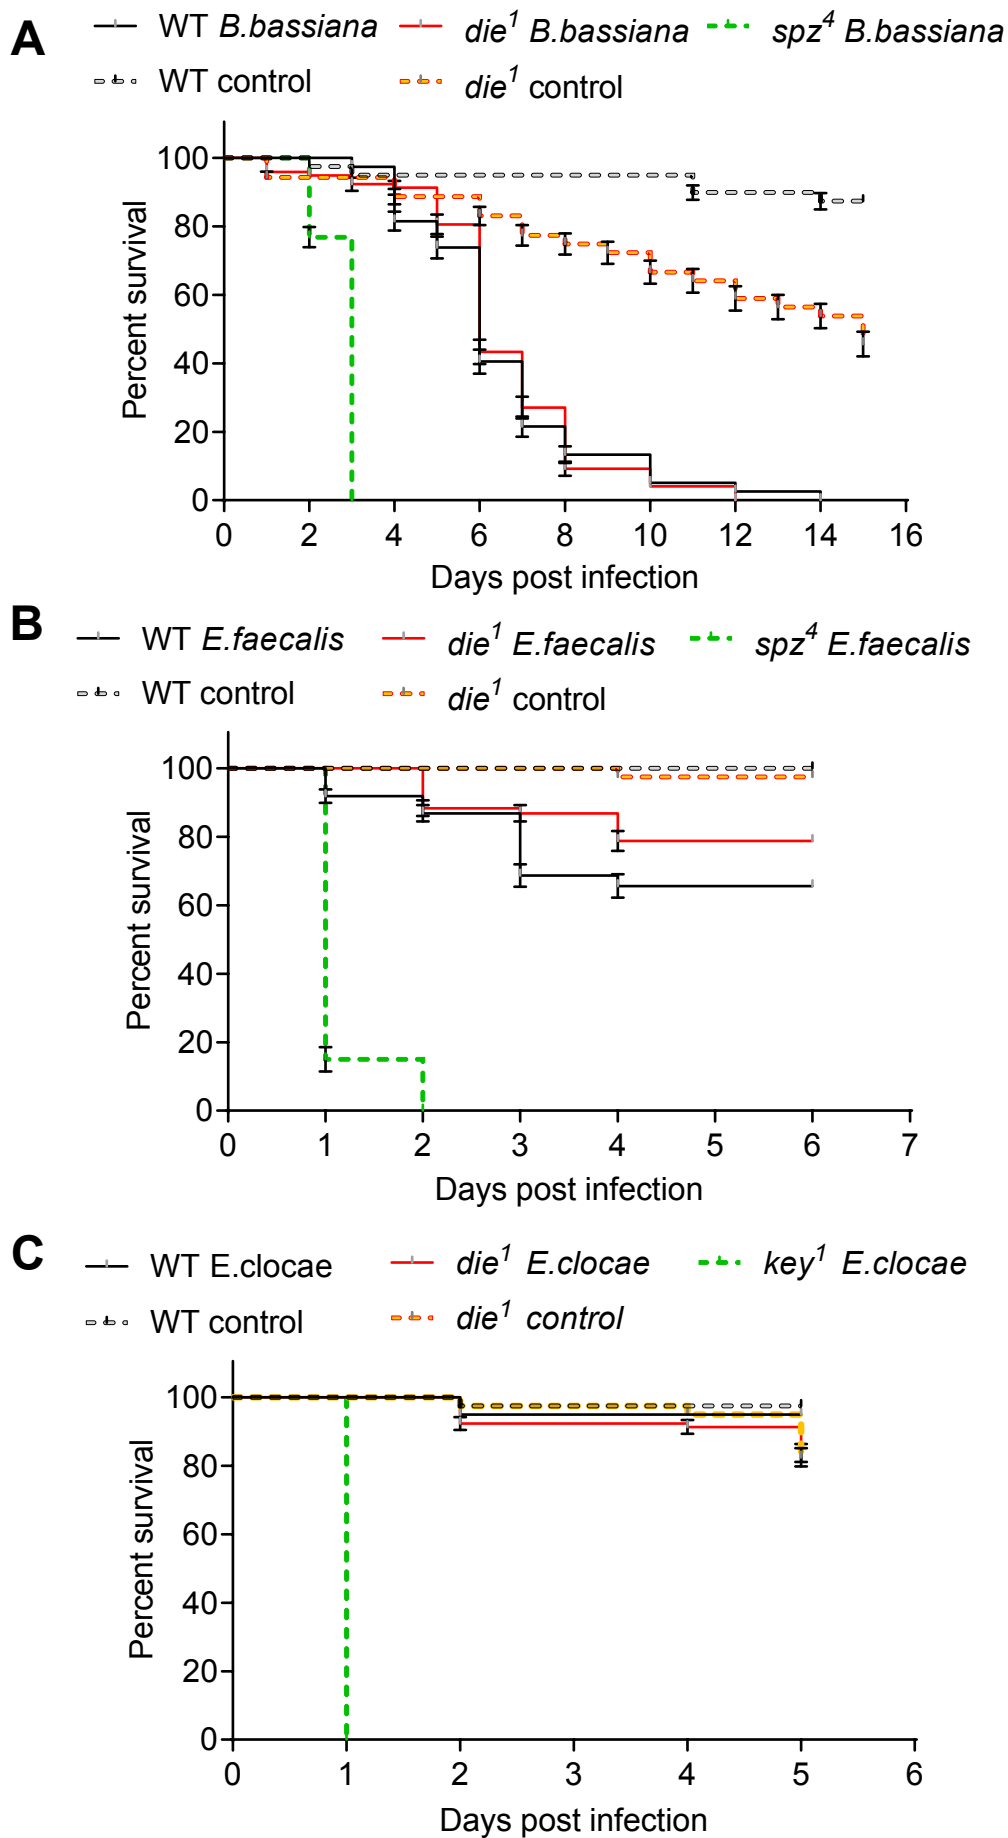

**Figure S8: *die*<sup>1</sup> mutants are not sensitive to bacterial and fungal infections.**

(A, B, C) Wild-type, *die*<sup>1</sup>, *spz*<sup>4</sup> (A, B), *key*<sup>1</sup> (C) flies were naturally infected with *B.bassiana* (A), or injected with *E.faecalis* (B) or *E.clocae* (C) and survival was monitored daily at 29°C. Data represent the mean and s.e. of three independent experiments, each containing 3 groups of 10 flies.



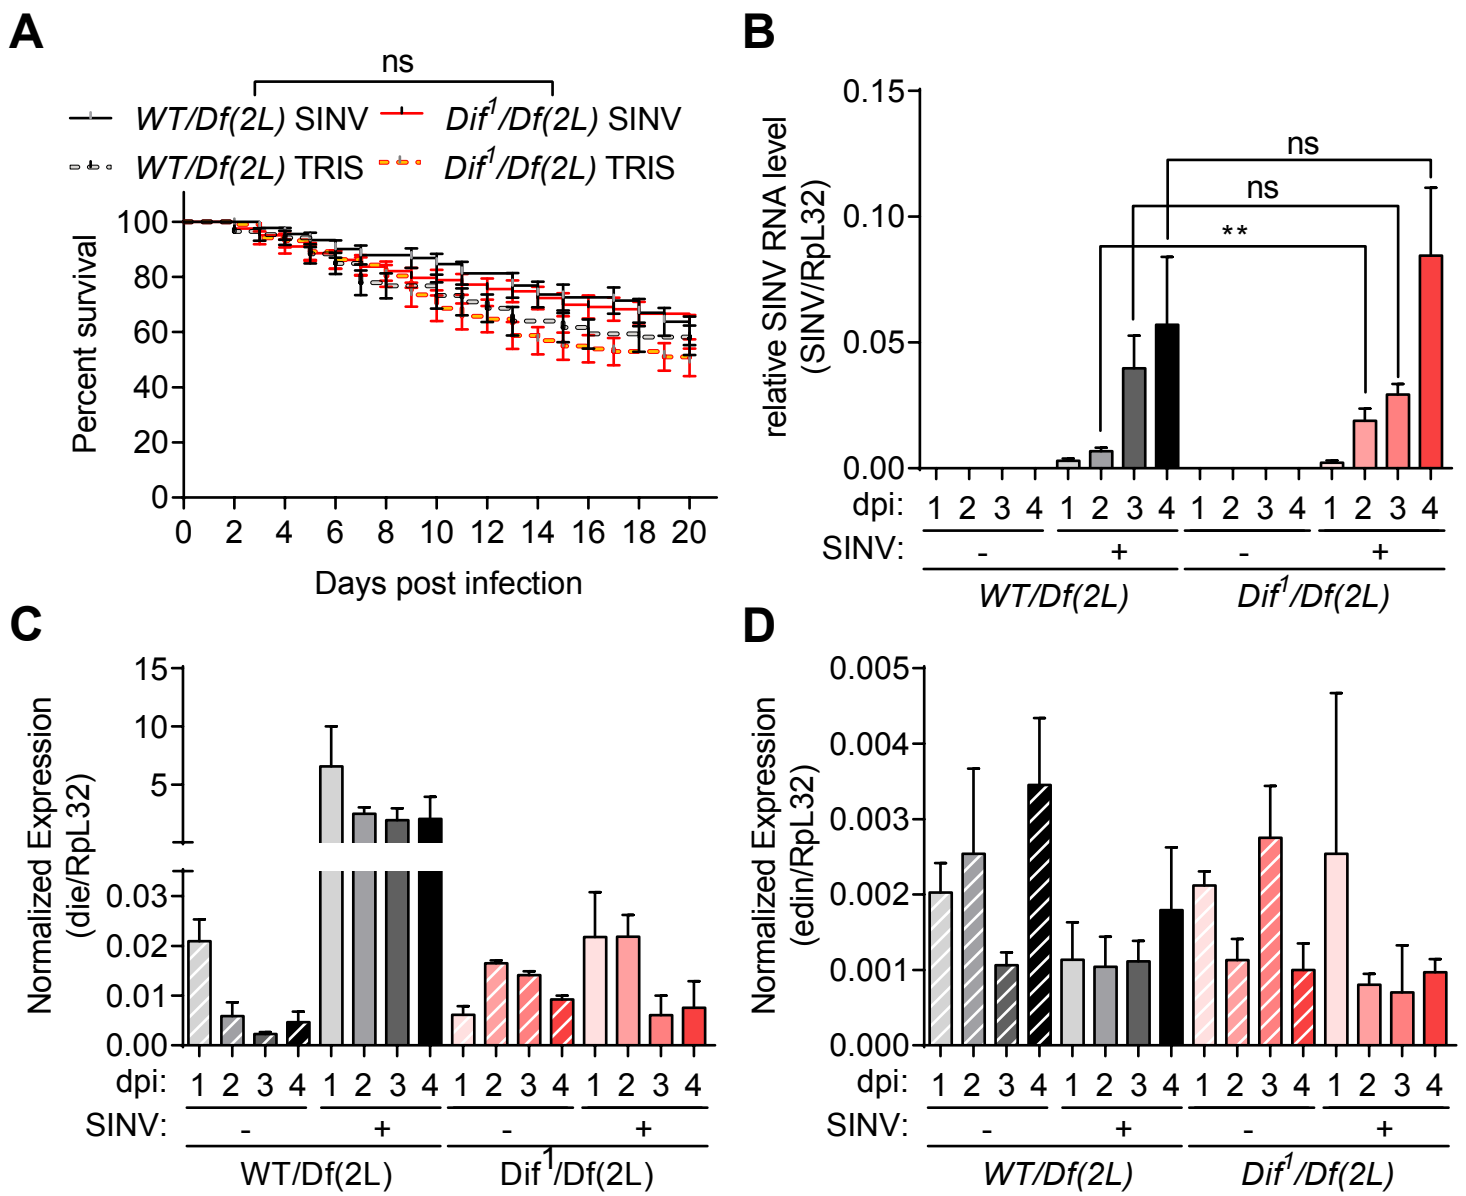

**Figure S9: The basal level of *die* is sufficient to protect against SINV infection.**

Hemizygotes flies expressing one (*WT/(Df(2L))*) or zero copy of the gene *Dif* (*Dif*<sup>1</sup>/*Df(2L)*) were injected with TRIS (-) or SINV (+). The deficiency covering the *Dif* gene is *Df(2L)Exel7068*. (A) The survival of these flies was monitored daily at 29°C. (B, C, D) The expression level of SINV (B), *die* (C) and *edin* (D) RNA were determined using qPCR at 1 to 4 dpi. Data represent the mean and s.e. (A) or s.d. (B-D) of three independent experiments, each containing three groups of 10 flies (A) or two group of 6 flies (B-D). Log rank (A) or t-test (B): ns  $p > 0.05$ , \*\*  $p < 0.01$ .

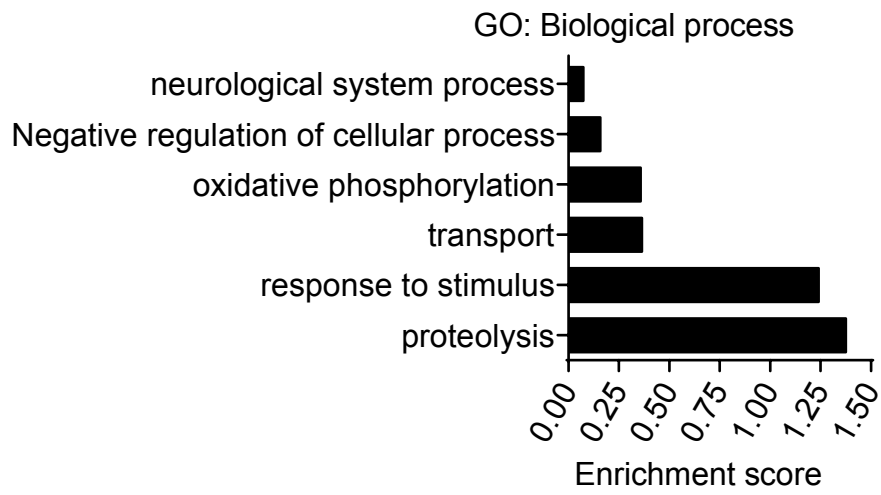

**Figure S10: Gene ontology analysis for biological process for the 69 downregulated genes in non infected conditions when *die* is mutated.**

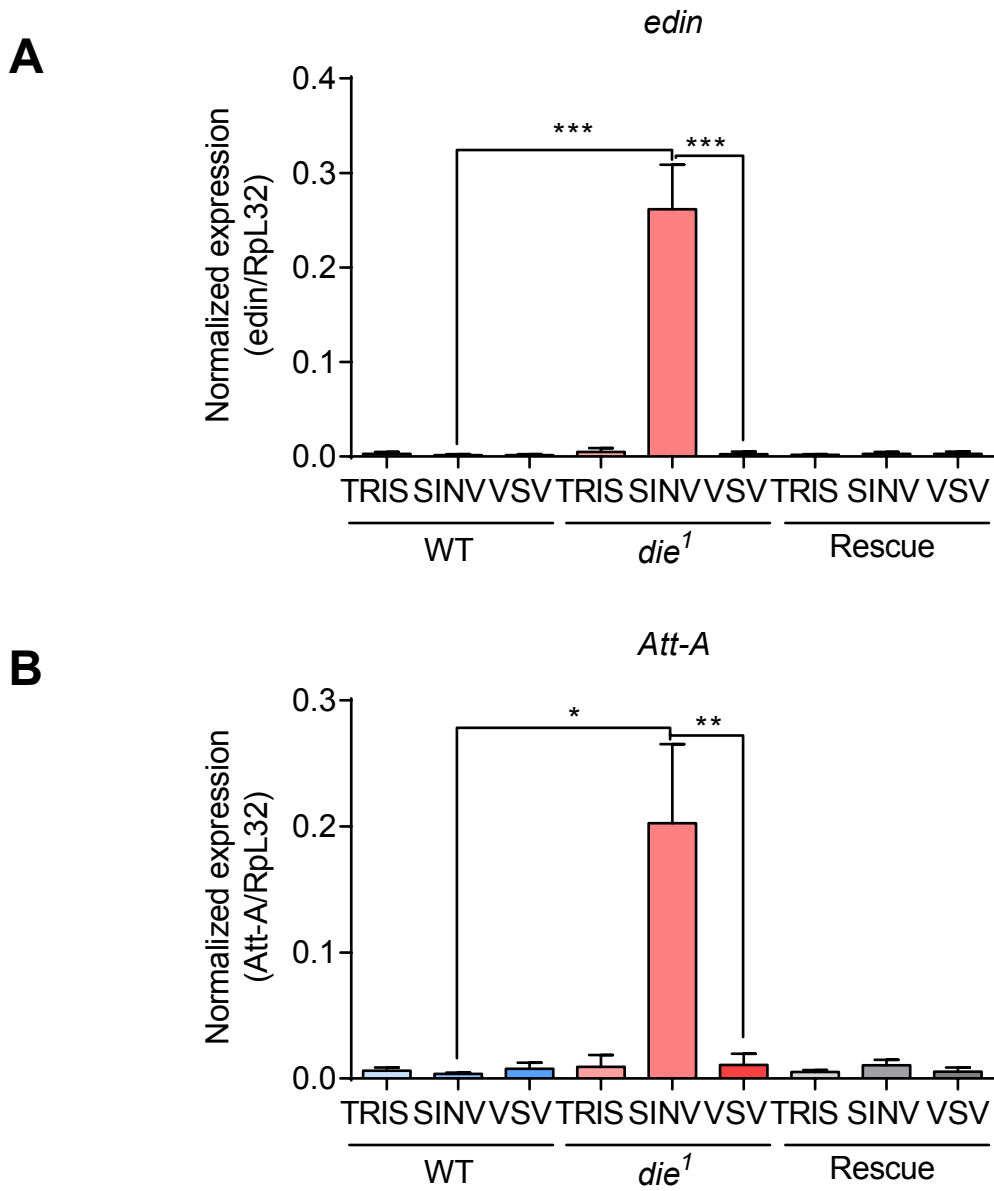

**Figure S11: *edin* and *Attacin-A* are not induced by VSV infection in *die*<sup>1</sup> mutant flies.**

(A, B) mRNA levels of *edin* (A) and *Attacin-A* (B) were monitored in wild-type and *die*<sup>1</sup> flies at 4 days post injection with Tris, SIN or VSV. Data represent the mean and s.d. of three independent experiments, each containing two groups of 6 flies. t-test: \*  $p < 0.05$ , \*\*  $p < 0.01$ , \*\*\*  $p < 0.001$ .

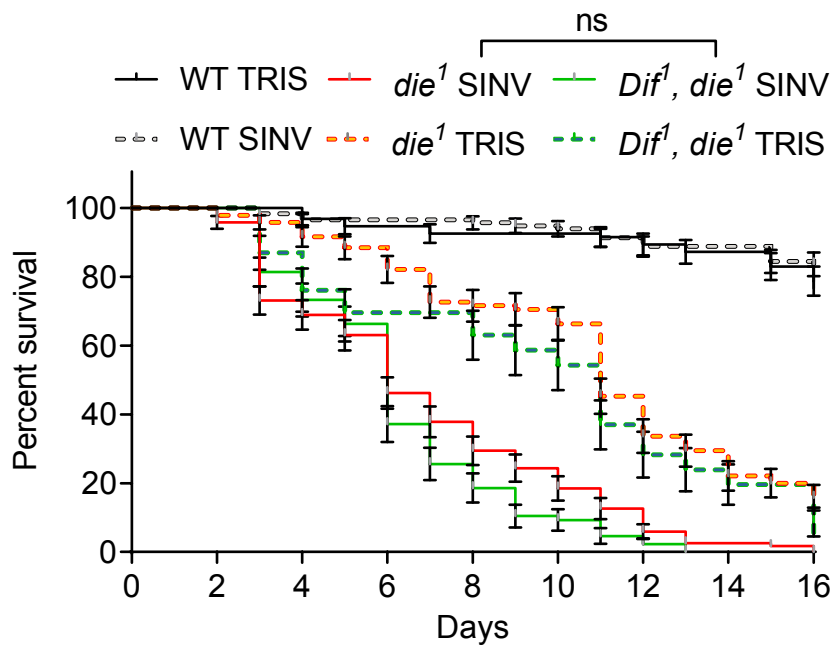

**Figure S12: *Dif* mutation cannot rescue the phenotype of *die* mutant flies.**

Wild-type, *die*<sup>1</sup>, and double mutant *Dif*<sup>1</sup>; *die*<sup>1</sup> flies were injected with Tris or SINV and survival was monitored daily at 29°C. Data represent the mean and s.e. of 3 independent experiments, each containing 3 groups of 10 flies. Log rank test: ns indicate that p > 0.05.

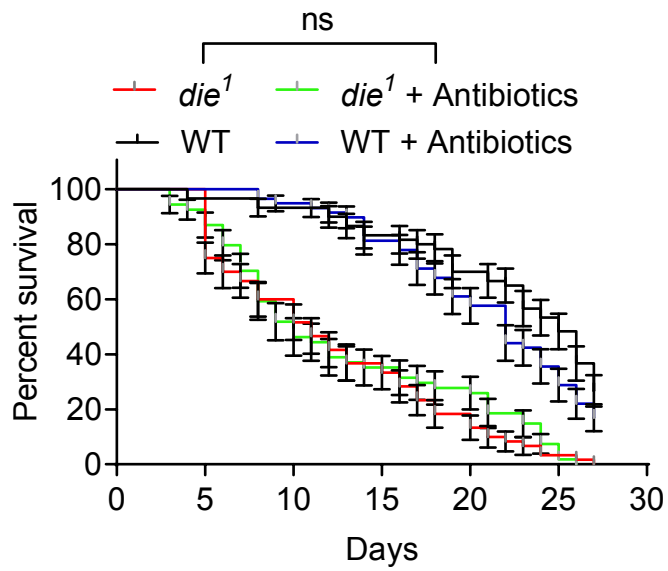

**Figure S13: Antibiotics treatment does not restore the survival of *die*<sup>1</sup> mutant flies.**

Survival of WT and *die*<sup>1</sup> mutant flies on normal and antibiotics media. Data represent the mean and s.e. of three independent experiments, each containing two groups of 10 flies. Log rank test: ns  $p > 0.05$ .

**A**

| Probe name   | Gene name        | Signal   |                            |           |                              | Ratio                          |         |                              |                                  |
|--------------|------------------|----------|----------------------------|-----------|------------------------------|--------------------------------|---------|------------------------------|----------------------------------|
|              |                  | WT NI    | <i>die</i> <sup>1</sup> NI | WT SINV   | <i>die</i> <sup>1</sup> SINV | <i>die</i> <sup>1</sup> /WT NI | WT SINV | <i>die</i> <sup>1</sup> SINV | <i>die</i> <sup>1</sup> /WT SINV |
| A_09_P008151 | <i>Caspar</i>    | 1287,66  | 1240,07                    | 1220,54   | 1076,88                      | 0,96                           | 0,95    | 0,87                         | 0,88                             |
| A_09_P021456 | <i>CYLD</i>      | 1481,61  | 1280,96                    | 1350,88   | 1338,88                      | 0,86                           | 0,91    | 1,05                         | 0,99                             |
| A_09_P026511 | <i>dnr1</i>      | 1902,61  | 1820,80                    | 1784,27   | 1834,83                      | 0,96                           | 0,94    | 1,01                         | 1,03                             |
| A_09_P026606 | <i>RYBP</i>      | 734,28   | 744,73                     | 775,03    | 752,98                       | 1,01                           | 1,06    | 1,01                         | 0,97                             |
| A_09_P053031 | <i>dUSP36</i>    | 2941,69  | 2658,60                    | 2777,50   | 2634,91                      | 0,90                           | 0,94    | 0,99                         | 0,95                             |
| A_09_P011671 | <i>faf</i>       | 458,70   | 408,39                     | 470,86    | 420,42                       | 0,89                           | 1,03    | 1,03                         | 0,89                             |
| A_09_P073846 | <i>PGRP-LB</i>   | 1670,96  | 1530,69                    | 2560,27   | 2384,58                      | 0,92                           | 1,53    | 1,56                         | 0,93                             |
| A_09_P054296 | <i>PGRP-LF</i>   | 713,69   | 1046,35                    | 973,59    | 1759,83                      | 1,47                           | 1,36    | 1,68                         | 1,81                             |
| A_09_P056556 | <i>PGRP-SC1a</i> | 16811,67 | 16952,60                   | 46478,80  | 15660,72                     | 1,01                           | 2,76    | 0,92                         | 0,34                             |
| A_09_P025276 | <i>PGRP-SC1b</i> | 41366,88 | 52970,67                   | 103938,70 | 49596,30                     | 1,28                           | 2,51    | 0,94                         | 0,48                             |
| A_09_P110955 | <i>PGRP-SC2</i>  | 67477,00 | 76402,20                   | 105704,95 | 136942,50                    | 1,13                           | 1,57    | 1,79                         | 1,30                             |
| A_09_P207530 | <i>pirk</i>      | 2164,10  | 3135,85                    | 5203,66   | 6293,94                      | 1,45                           | 2,40    | 2,01                         | 1,21                             |
| A_09_P062616 | <i>POSH</i>      | 494,69   | 539,00                     | 537,69    | 581,31                       | 1,09                           | 1,09    | 1,08                         | 1,08                             |
| A_09_P073176 | <i>trbd</i>      | 3294,05  | 2888,56                    | 2853,13   | 2775,30                      | 0,88                           | 0,87    | 0,96                         | 0,97                             |
| A_09_P074691 | <i>wntD</i>      | 100,66   | 68,00                      | 80,00     | 84,78                        | 0,68                           | 0,79    | 1,25                         | 1,06                             |

**B**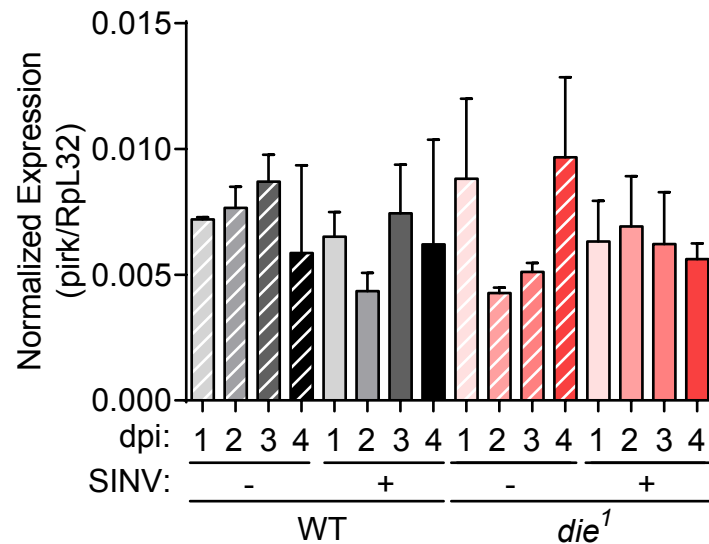

**Figure S14: The *die*<sup>1</sup> mutation does not affect expression of known inhibitors of the IMD pathway.**

(A) This table represents the signal and the fold change for the expression of known negative regulators of the IMD pathway in a microarray experiment. Genes colored in red have more than 25% of difference between biological duplicates. (B) The expression level of *pirk* mRNA was determined in WT and *die*<sup>1</sup> flies injected by TRIS (-) or SINV (+) using qRT-PCR at 1 to 4 dpi. Data represent the mean and s.d. of two independent experiments, each containing two groups of 6 flies.

**A**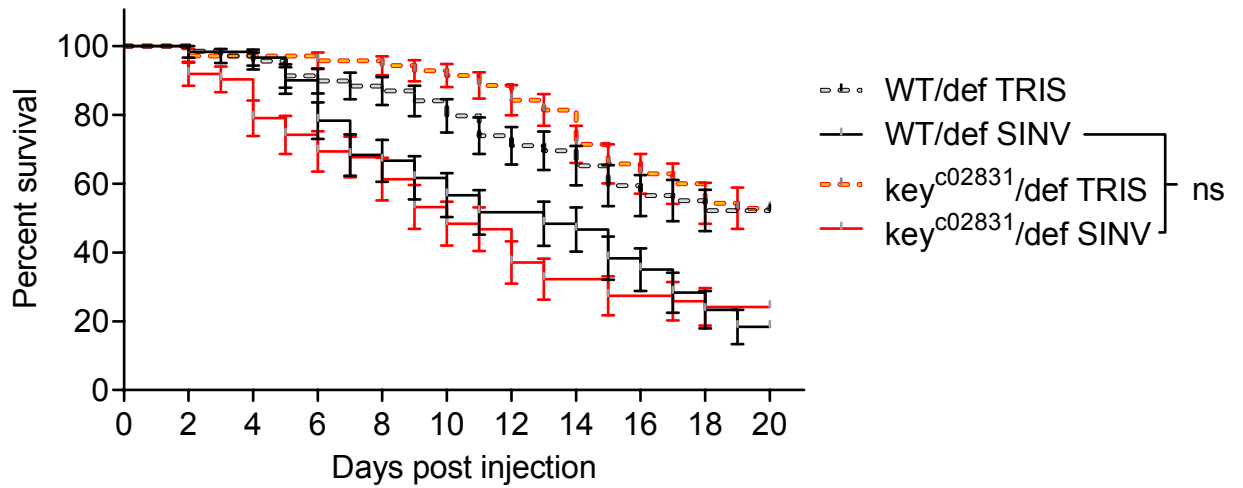**B**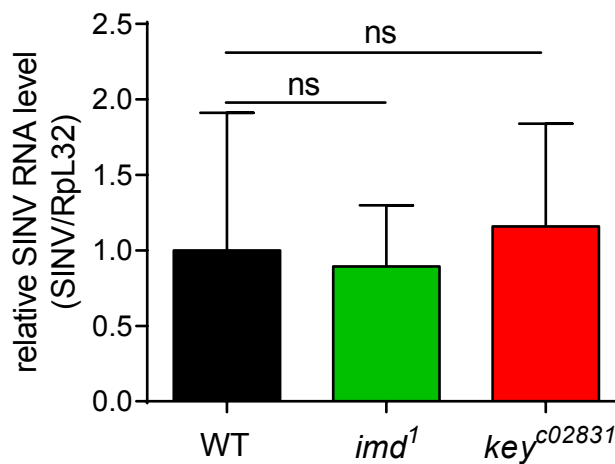

**Figure S15: IMD pathway mutant flies are not sensitive to SINV infection.**

(A) Survival of WT (*w*<sup>1118</sup>) and *key* null flies (*key*<sup>c02831</sup>) crossed with flies carrying the deficiency Df (2R)BSC856 covering the *key* gene (def) after TRIS and SINV injection at 29°C. (B) Viral load of WT (*w*<sup>1118</sup>), *imd*<sup>1</sup> and *key*<sup>c02831</sup> flies infected with SINV at 4dpi (29°C). Data represent the mean and s.e. (A) or s.d. (B) of three independent experiments, each containing three groups of 10 (A) or 6 flies (B). Log rank test (A) and t-test (B): ns indicates that  $p > 0.05$ .

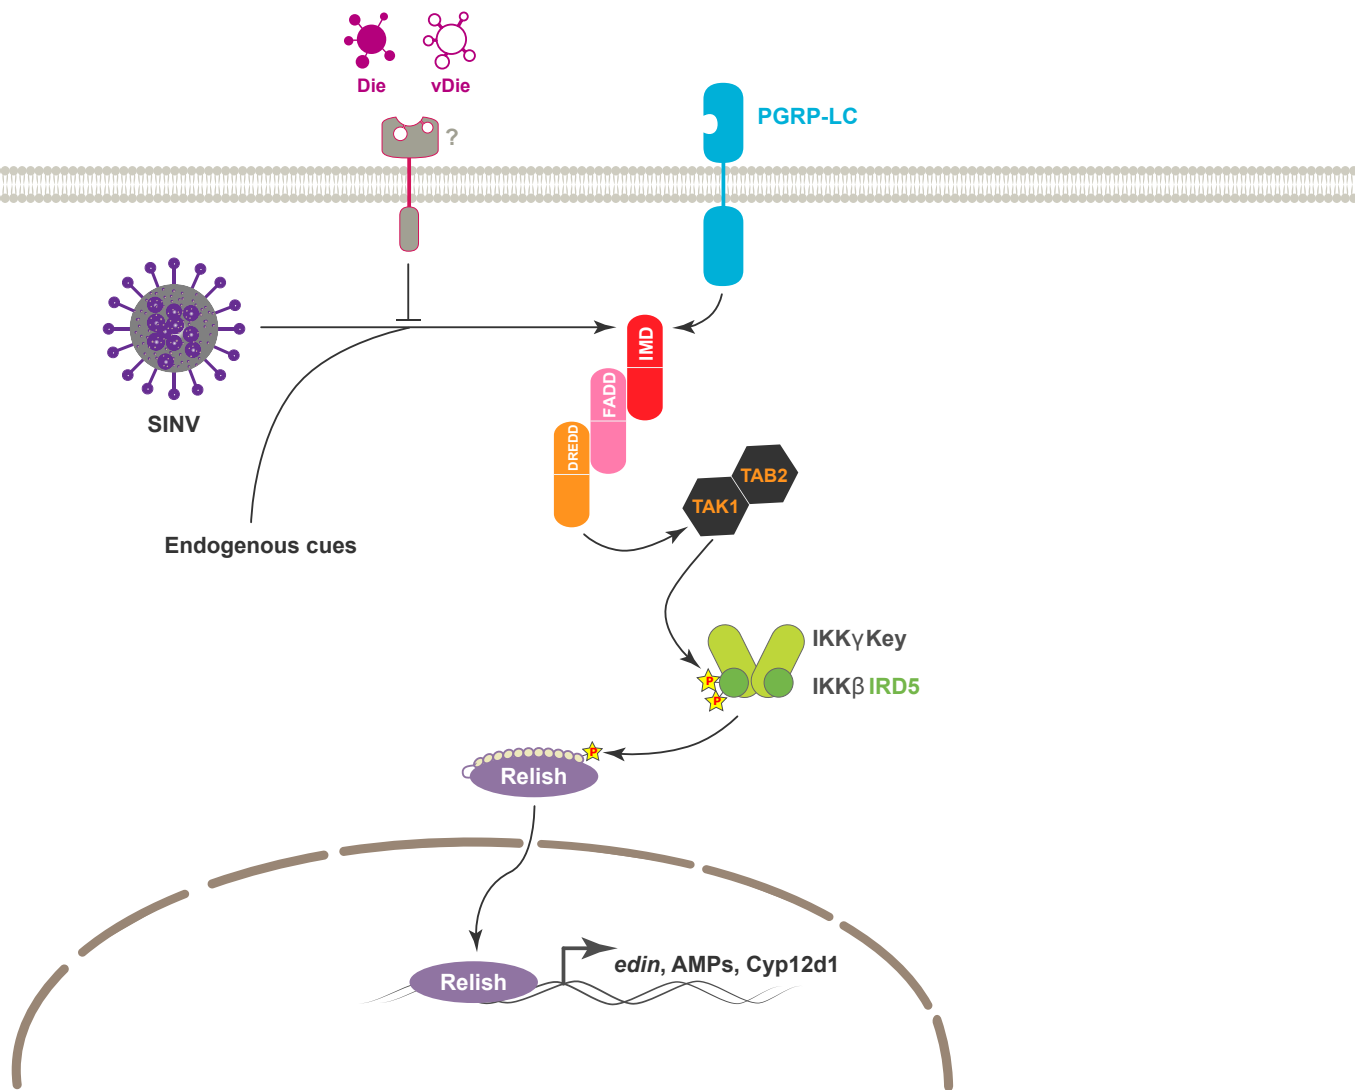

**Figure S16: A model for the regulation of the IMD pathway by Diedel.**

We propose that Diedel, acting through an uncharacterized membrane receptor, prevents activation of IMD independently of PGRP receptors. This model accounts for the fact that (i) the phenotype of *die*<sup>1</sup> mutant is reverted in an *imd* mutant context, placing *die* upstream of *imd*, and (ii) *die*<sup>1</sup> mutant flies resist normally to bacterial infections, and upregulation of IMD target genes in *die*<sup>1</sup> mutant flies is not affected by antibiotic treatment.



Table S1: List of genes induced and repressed in non infected *die*<sup>1</sup> mutant fliesTable S1: List of genes induced and repressed in non infected *die*<sup>1</sup> mutant flies

| Probe number                                                 | SYMBOL        | Gene name                                     | Flybase ID  | GO_Biological Process                        | <i>die</i> <sup>1</sup> /WT: non infected | WT: SINV/non infected | <i>die</i> <sup>1</sup> : SINV/Non infected | <i>die</i> <sup>1</sup> /WT SINV |
|--------------------------------------------------------------|---------------|-----------------------------------------------|-------------|----------------------------------------------|-------------------------------------------|-----------------------|---------------------------------------------|----------------------------------|
| <b>Induced in <i>Die</i><sup>1</sup> mutant non infected</b> |               |                                               |             |                                              |                                           |                       |                                             |                                  |
| A_09_P134045                                                 | Cyp12d1-d     | Cyp12d1-d                                     | FBgn0053503 | oxidation-reduction process                  | 55,60                                     | 1,13                  | 0,93                                        | 46,00                            |
| A_09_P028156                                                 | CG13905       | -                                             | FBgn0035176 | -                                            | 51,47                                     | 1,75                  | 0,98                                        | 28,72                            |
| A_09_P040931                                                 | CG1304        | -                                             | FBgn0031141 | proteolysis                                  | 48,76                                     | 1,11                  | 1,20                                        | 52,68                            |
| A_09_P005646                                                 | Cyp4p2        | Cyp4p2                                        | FBgn0033395 | oxidation-reduction process                  | 45,42                                     | 1,26                  | 1,20                                        | 43,42                            |
| A_09_P060946                                                 | CG7567        | -                                             | FBgn0039670 | -                                            | 19,03                                     | 1,57                  | 0,98                                        | 11,82                            |
| A_09_P129245                                                 | CG16762       | -                                             | FBgn0035343 | -                                            | 14,34                                     | 0,72                  | 0,96                                        | 18,97                            |
| A_09_P029476                                                 | Ser6          | Serine protease 6                             | FBgn0011834 | proteolysis                                  | 8,55                                      | 1,12                  | 1,25                                        | 9,55                             |
| A_09_P112030                                                 | CG10140       | -                                             | FBgn0036363 | chitin metabolic process                     | 7,60                                      | 1,24                  | 0,91                                        | 5,61                             |
| A_09_P019026                                                 | Sr-CIV        | Scavenger receptor class C, type IV           | FBgn0031547 | defense response                             | 6,60                                      | 1,17                  | 1,21                                        | 6,86                             |
| A_09_P129495                                                 | CG7912        | -                                             | FBgn0039736 | sulfate transport                            | 6,41                                      | 0,83                  | 0,99                                        | 7,67                             |
| A_09_P045016                                                 | LysX          | Lysozyme X                                    | FBgn0004431 | defense response                             | 5,74                                      | 1,49                  | 1,18                                        | 4,55                             |
| A_09_P015351                                                 | CG32368       | -                                             | FBgn0052368 | -                                            | 5,58                                      | 3,12                  | 1,07                                        | 1,92                             |
| A_09_P007351                                                 | CG42807       | -                                             | FBgn0261989 | -                                            | 5,48                                      | 2,24                  | 1,26                                        | 3,08                             |
| A_09_P197010                                                 | CG34391       | -                                             | FBgn0085420 | -                                            | 5,21                                      | 0,87                  | 0,82                                        | 4,91                             |
| A_09_P004846                                                 | CG42666       | -                                             | FBgn0261548 | -                                            | 5,10                                      | 1,18                  | 0,88                                        | 3,79                             |
| A_09_P007126                                                 | CG13324       | -                                             | FBgn0033789 | -                                            | 4,90                                      | 1,32                  | 1,08                                        | 4,00                             |
| A_09_P045891                                                 | DptB          | Diptericin B                                  | FBgn0034407 | antibacterial humoral response               | 4,79                                      | 2,94                  | 6,36                                        | 10,36                            |
| A_09_P030936                                                 | veg           | vegetable                                     | FBgn0265195 | peripheral nervous system development        | 4,79                                      | 0,98                  | 1,01                                        | 4,95                             |
| A_09_P025181                                                 | Cyp6a14       | Cyp6a14                                       | FBgn0033302 | -                                            | 4,40                                      | 1,03                  | 1,09                                        | 4,64                             |
| A_09_P041636                                                 | CecC          | Cecropin C                                    | FBgn0000279 | response to bacterium                        | 4,36                                      | 1,92                  | 2,36                                        | 5,36                             |
| A_09_P030406                                                 | Mtk           | Metchnikowin                                  | FBgn0014865 | response to bacterium                        | 4,02                                      | 3,06                  | 4,70                                        | 6,17                             |
| A_09_P114595                                                 | Def           | Defensin                                      | FBgn0010385 | response to bacterium                        | 4,00                                      | 1,19                  | 1,41                                        | 4,74                             |
| A_09_P113770                                                 | CG12780       | -                                             | FBgn0033301 | defense response to virus                    | 3,92                                      | 1,05                  | 0,87                                        | 3,28                             |
| A_09_P056566                                                 | PGRP-SB1      | PGRP-SB1                                      | FBgn0043578 | immune response                              | 3,80                                      | 3,83                  | 4,60                                        | 4,57                             |
| A_09_P204936                                                 | CG11504       | -                                             | FBgn0039733 | -                                            | 3,78                                      | 1,43                  | 1,04                                        | 2,76                             |
| A_09_P045121                                                 | sls           | sallimus                                      | FBgn0086906 | regulation of hemocyte proliferation         | 3,77                                      | 0,88                  | 0,60                                        | 2,57                             |
| A_09_P215425                                                 | CG32198       | -                                             | FBgn0052198 | -                                            | 3,68                                      | 0,34                  | 0,54                                        | 5,86                             |
| A_09_P053436                                                 | CG15829       | -                                             | FBgn0035743 | cellular acyl-CoA homeostasis                | 3,58                                      | 2,27                  | 1,12                                        | 1,77                             |
| A_09_P195390                                                 | A2bp1         | Ataxin-2 binding protein 1                    | FBgn0052062 | oogenesis                                    | 3,41                                      | 1,33                  | 0,85                                        | 2,18                             |
| A_09_P113810                                                 | GstE10        | Glutathione S transferase E10                 | FBgn0063499 | glutathione metabolic process                | 3,24                                      | 0,96                  | 0,81                                        | 2,74                             |
| A_09_P079516                                                 | rgn           | regeneration                                  | FBgn0261258 | tissue regeneration                          | 3,21                                      | 1,06                  | 0,82                                        | 2,49                             |
| A_09_P104130                                                 | CG1698        | -                                             | FBgn0033443 | neurotransmitter transport                   | 3,16                                      | 1,52                  | 1,25                                        | 2,61                             |
| A_09_P180200                                                 | CG13795       | -                                             | FBgn0031937 | neurotransmitter transport                   | 3,14                                      | 1,70                  | 1,62                                        | 2,99                             |
| A_09_P073141                                                 | Fst           | Frost                                         | FBgn0037724 | response to cold                             | 3,11                                      | 2,37                  | 1,33                                        | 1,75                             |
| A_09_P056576                                                 | CG8147        | -                                             | FBgn0043791 | metabolic process                            | 3,10                                      | 0,78                  | 0,94                                        | 3,76                             |
| A_09_P000871                                                 | CG33965       | -                                             | FBgn0053965 | transport                                    | 3,08                                      | 0,97                  | 0,90                                        | 2,86                             |
| A_09_P063516                                                 | CG13177       | -                                             | FBgn0040759 | -                                            | 3,07                                      | 1,46                  | 1,29                                        | 2,72                             |
| A_09_P075531                                                 | CG5399        | -                                             | FBgn0038353 | -                                            | 3,05                                      | 0,98                  | 0,93                                        | 2,91                             |
| A_09_P024916                                                 | CG12824       | -                                             | FBgn0033222 | -                                            | 3,05                                      | 1,34                  | 0,87                                        | 1,99                             |
| A_09_P022221                                                 | Phae2         | Phaedra 2                                     | FBgn0263235 | proteolysis                                  | 3,03                                      | 3,22                  | 1,12                                        | 1,05                             |
| A_09_P018931                                                 | CG8837        | -                                             | FBgn0031520 | transmembrane transport                      | 3,01                                      | 1,05                  | 0,99                                        | 2,84                             |
| A_09_P037756                                                 | PGRP-SA       | Peptidoglycan recognition protein SA          | FBgn0030310 | immune response                              | 2,90                                      | 2,40                  | 1,44                                        | 1,74                             |
| A_09_P129300                                                 | CG18609       | -                                             | FBgn0034382 | fatty acid elongation                        | 2,90                                      | 1,61                  | 0,70                                        | 1,26                             |
| A_09_P059486                                                 | CG31272       | -                                             | FBgn0051272 | transport                                    | 2,90                                      | 0,85                  | 1,06                                        | 3,63                             |
| A_09_P168525                                                 | phr           | photorepair                                   | FBgn0003082 | DNA repair                                   | 2,87                                      | 0,88                  | 1,11                                        | 3,60                             |
| A_09_P042021                                                 | Cyp6a2        | Cytochrome P450-6a2                           | FBgn0000473 | oxidation-reduction process                  | 2,87                                      | 1,03                  | 1,01                                        | 2,81                             |
| A_09_P003596                                                 | CG34284       | -                                             | FBgn0085313 | -                                            | 2,86                                      | 1,09                  | 0,90                                        | 2,37                             |
| A_09_P028636                                                 | CG1139        | -                                             | FBgn0035300 | growth                                       | 2,81                                      | 1,13                  | 0,95                                        | 2,37                             |
| A_09_P040116                                                 | CG15043       | -                                             | FBgn0030929 | -                                            | 2,78                                      | 1,20                  | 0,84                                        | 1,95                             |
| A_09_P035761                                                 | CG11425       | -                                             | FBgn0037167 | dephosphorylation                            | 2,78                                      | 1,34                  | 1,31                                        | 2,71                             |
| A_09_P027001                                                 | CG10332       | -                                             | FBgn0260455 | -                                            | 2,76                                      | 3,08                  | 5,39                                        | 4,82                             |
| A_09_P048671                                                 | spn-F         | spn-F                                         | FBgn0086362 | oocyte microtubule cytoskeleton organization | 2,70                                      | 0,94                  | 1,03                                        | 2,95                             |
| A_09_P171450                                                 | Gr98a         | Gustatory receptor 98a                        | FBgn0039520 | sensory perception of taste                  | 2,70                                      | 0,98                  | 0,84                                        | 2,33                             |
| A_09_P021706                                                 | CG17107       | -                                             | FBgn0032281 | -                                            | 2,67                                      | 1,71                  | 1,19                                        | 1,87                             |
| A_09_P016591                                                 | Dh31-R        | Diuretic hormone 31 Receptor                  | FBgn0052843 | G-protein coupled receptor signaling pathway | 2,65                                      | 0,97                  | 0,92                                        | 2,54                             |
| A_09_P072481                                                 | CG11671       | -                                             | FBgn0037562 | neuromuscular process                        | 2,65                                      | 1,52                  | 1,01                                        | 1,76                             |
| A_09_P042786                                                 | Hsp22         | Heat shock protein 22                         | FBgn0001223 | response to heat                             | 2,65                                      | 0,94                  | 0,74                                        | 2,07                             |
| A_09_P174270                                                 | Bacc          | Bacchus                                       | FBgn0031453 | behavioral response to ethanol               | 2,63                                      | 1,21                  | 0,95                                        | 2,06                             |
| A_09_P194406                                                 | Tsp2A         | Tetraspanin 2A                                | FBgn0024361 | -                                            | 2,60                                      | 1,14                  | 0,90                                        | 2,06                             |
| A_09_P052846                                                 | CG13704       | -                                             | FBgn0035583 | -                                            | 2,58                                      | 1,09                  | 0,96                                        | 2,27                             |
| A_09_P146530                                                 | CG15210       | -                                             | FBgn0040850 | -                                            | 2,58                                      | 1,30                  | 1,02                                        | 2,01                             |
| A_09_P064591                                                 | CG18853       | -                                             | FBgn0042173 | DNA repair                                   | 2,56                                      | 0,83                  | 0,96                                        | 2,98                             |
| A_09_P014306                                                 | CG32024       | -                                             | FBgn0052024 | chitin metabolic process                     | 2,56                                      | 1,06                  | 0,80                                        | 1,93                             |
| A_09_P050676                                                 | CG15160       | -                                             | FBgn0032688 | -                                            | 2,55                                      | 1,31                  | 1,29                                        | 2,51                             |
| A_09_P078261                                                 | prominin-like | prominin-like                                 | FBgn0026189 | neuron projection morphogenesis              | 2,55                                      | 1,11                  | 0,97                                        | 2,23                             |
| A_09_P044716                                                 | shi           | shibire                                       | FBgn0003392 | vesicle-mediated transport                   | 2,54                                      | 1,20                  | 0,72                                        | 1,51                             |
| A_09_P047886                                                 | Khc-73        | Kinesin heavy chain 73                        | FBgn0019968 | microtubule-based movement                   | 2,53                                      | 0,88                  | 0,89                                        | 2,56                             |
| A_09_P076236                                                 | AttD          | Attacin-D                                     | FBgn0038530 | defense response to Gram-positive bacterium  | 2,52                                      | 2,18                  | 2,93                                        | 3,39                             |
| A_09_P121465                                                 | Pvf2          | PDGF- and VEGF-related factor 2               | FBgn0031888 | hemocyte migration                           | 2,51                                      | 1,42                  | 1,32                                        | 2,33                             |
| A_09_P007121                                                 | CG13323       | -                                             | FBgn0033788 | -                                            | 2,50                                      | 1,25                  | 1,05                                        | 2,10                             |
| A_09_P017326                                                 | CG33258       | -                                             | FBgn0053258 | chitin metabolic process                     | 2,50                                      | 0,92                  | 1,19                                        | 3,24                             |
| A_09_P108115                                                 | Arpc3B        | Actin-related protein 2/3 complex, subunit 3B | FBgn0065032 | actin filament organization                  | 2,45                                      | 1,06                  | 0,91                                        | 2,10                             |

Table S1: List of genes induced and repressed in non infected die<sup>1</sup> mutant flies

|              |           |                                                     |             |                                                        |      |        |       |      |
|--------------|-----------|-----------------------------------------------------|-------------|--------------------------------------------------------|------|--------|-------|------|
| A_09_P006576 | Damm      | Death associated molecule related to Mch2 caspase   | FBgn0033659 | programmed cell death                                  | 2,44 | 0,87   | 0,98  | 2,74 |
| A_09_P064786 | MESK4     | Misexpression suppressor of KSR 4                   | FBgn0043069 | positive regulation of Ras protein signal transduction | 2,44 | 1,08   | 0,99  | 2,23 |
| A_09_P026601 | CG4250    | -                                                   | FBgn0034761 | -                                                      | 2,43 | 2,98   | 1,79  | 1,46 |
| A_09_P010311 | Dpt       | Diptericin                                          | FBgn0004240 | response to bacterium                                  | 2,42 | 2,09   | 6,79  | 7,87 |
| A_09_P043736 | MtnB      | Metallothionein B                                   | FBgn0002869 | response to metal ion                                  | 2,40 | 1,32   | 0,63  | 1,15 |
| A_09_P126820 | CG32523   | -                                                   | FBgn0052523 | proteolysis                                            | 2,38 | 1,24   | 0,91  | 1,74 |
| A_09_P065776 | CSN8      | COP9 signalosome subunit 8                          | FBgn0261437 | defense response to bacterium                          | 2,38 | 1,46   | 1,05  | 1,71 |
| A_09_P018246 | CG42329   | -                                                   | FBgn0259229 | -                                                      | 2,37 | 0,83   | 0,92  | 2,61 |
| A_09_P209075 | fuss      | fussel                                              | FBgn0039932 | negative regulation of BMP signaling pathway           | 2,36 | 1,44   | 0,75  | 1,22 |
| A_09_P033006 | Cht4      | Chitinase 4                                         | FBgn0022700 | chitin catabolic process                               | 2,35 | 1,22   | 1,10  | 2,12 |
| A_09_P007646 | Arc2      | Arc2                                                | FBgn0033928 | -                                                      | 2,35 | 4,66   | 2,32  | 1,17 |
| A_09_P043361 | Lsp1alpha | Larval serum protein 1 alpha                        | FBgn0002562 | -                                                      | 2,34 | 1,10   | 1,13  | 2,43 |
| A_09_P014056 | Mur29B    | Mucin related 29B                                   | FBgn0051901 | -                                                      | 2,34 | 1,18   | 1,23  | 2,45 |
| A_09_P069016 | CG14292   | -                                                   | FBgn0038658 | -                                                      | 2,33 | 1,01   | 0,99  | 2,29 |
| A_09_P100340 | CG34198   | -                                                   | FBgn0085227 | -                                                      | 2,33 | 1,58   | 1,10  | 1,62 |
| A_09_P216475 | CG15127   | -                                                   | FBgn0040730 | -                                                      | 2,33 | 1,13   | 0,77  | 1,59 |
| A_09_P075961 | CG18622   | -                                                   | FBgn0038460 | -                                                      | 2,33 | 1,99   | 0,97  | 1,14 |
| A_09_P012906 | Bsg       | Basigin                                             | FBgn0261822 | localization                                           | 2,32 | 1,68   | 0,85  | 1,17 |
| A_09_P017061 | MtnD      | Metallothionein D                                   | FBgn0053192 | response to metal ion                                  | 2,30 | 1,85   | 0,70  | 0,87 |
| A_09_P163340 | CG43693   | -                                                   | FBgn0263776 | -                                                      | 2,30 | 1,72   | 0,82  | 1,09 |
| A_09_P019556 | TotM      | Turandot M                                          | FBgn0031701 | response to bacterium                                  | 2,29 | 115,21 | 50,82 | 1,01 |
| A_09_P128930 | CG13075   | -                                                   | FBgn0036563 | chitin metabolic process                               | 2,28 | 1,31   | 1,37  | 2,37 |
| A_09_P008496 | CG5550    | -                                                   | FBgn0034160 | -                                                      | 2,28 | 1,48   | 1,25  | 1,91 |
| A_09_P039921 | CG15814   | -                                                   | FBgn0030873 | -                                                      | 2,27 | 1,07   | 0,97  | 2,05 |
| A_09_P075866 | Der-2     | Derlin-2                                            | FBgn0038438 | defense response to bacterium                          | 2,26 | 2,27   | 1,05  | 1,04 |
| A_09_P206230 | CG42728   | -                                                   | FBgn0261681 | chitin metabolic process                               | 2,26 | 1,22   | 0,87  | 1,61 |
| A_09_P041161 | Act88F    | Actin 88F                                           | FBgn0000047 | cytoskeleton organization                              | 2,25 | 1,87   | 0,84  | 1,02 |
| A_09_P153830 | CG33470   | -                                                   | FBgn0053470 | -                                                      | 2,24 | 2,24   | 1,99  | 1,99 |
| A_09_P008901 | CG18635   | -                                                   | FBgn0034279 | -                                                      | 2,22 | 1,02   | 1,05  | 2,27 |
| A_09_P024961 | CG14764   | -                                                   | FBgn0033236 | -                                                      | 2,21 | 1,07   | 1,03  | 2,13 |
| A_09_P024951 | CG8791    | -                                                   | FBgn0033234 | transmembrane transport                                | 2,21 | 1,16   | 0,85  | 1,61 |
| A_09_P054476 | CG8329    | -                                                   | FBgn0036022 | proteolysis                                            | 2,20 | 1,04   | 0,71  | 1,51 |
| A_09_P068056 | CG15330   | -                                                   | FBgn0029987 | lateral inhibition                                     | 2,20 | 1,27   | 0,82  | 1,41 |
| A_09_P032386 | Fak       | Focal adhesion kinase                               | FBgn0020440 | negative regulation of MAP kinase activity             | 2,18 | 2,11   | 0,89  | 0,92 |
| A_09_P026526 | CG4269    | -                                                   | FBgn0034741 | -                                                      | 2,16 | 1,59   | 1,25  | 1,71 |
| A_09_P031241 | Rab19     | Rab19                                               | FBgn0015793 | protein transport                                      | 2,13 | 2,30   | 1,06  | 0,99 |
| A_09_P035511 | CapaR     | Capability receptor                                 | FBgn0037100 | neuropeptide signaling pathway                         | 2,13 | 0,96   | 1,04  | 2,32 |
| A_09_P050506 | CG15282   | -                                                   | FBgn0028855 | -                                                      | 2,13 | 1,32   | 1,51  | 2,44 |
| A_09_P023311 | Swip-1    | Swiprosin-1                                         | FBgn0032731 | mesoderm development                                   | 2,12 | 1,24   | 1,10  | 1,89 |
| A_09_P028546 | Cpr62Bb   | Cuticular protein 62Bb                              | FBgn0035280 | chitin-based cuticle development                       | 2,12 | 1,28   | 1,08  | 1,79 |
| A_09_P218475 | Ady43A    | Ady43A                                              | FBgn0026602 | -                                                      | 2,12 | 1,27   | 0,87  | 1,45 |
| A_09_P075741 | Zip89B    | Zinc/iron regulated transporter-related protein 89B | FBgn0038412 | metal ion transport                                    | 2,12 | 1,14   | 1,20  | 2,23 |
| A_09_P068806 | CG7142    | -                                                   | FBgn0038595 | proteolysis                                            | 2,12 | 1,06   | 0,85  | 1,69 |
| A_09_P170670 | Sr-CI     | Scavenger receptor class C, type I                  | FBgn0014033 | immune response                                        | 2,11 | 2,01   | 1,33  | 1,40 |
| A_09_P176135 | PlexA     | Plexin A                                            | FBgn0025741 | axon guidance                                          | 2,11 | 1,33   | 0,83  | 1,32 |
| A_09_P053051 | Tektin-C  | Tektin C                                            | FBgn0035638 | microtubule-based process                              | 2,10 | 0,76   | 0,99  | 2,72 |
| A_09_P025411 | PPO2      | Prophenoloxidase 2                                  | FBgn0033367 | defense response to Gram-positive bacterium            | 2,10 | 2,57   | 1,98  | 1,62 |
| A_09_P045161 | IM2       | Immune induced molecule 2                           | FBgn0025583 | defense response                                       | 2,10 | 3,33   | 1,93  | 1,22 |
| A_09_P120937 | Ssk       | Snakeskin                                           | FBgn0036945 | intestinal epithelial cell development                 | 2,09 | 1,13   | 1,02  | 1,89 |
| A_09_P216700 | CG15369   | -                                                   | FBgn0030105 | -                                                      | 2,08 | 5,68   | 3,19  | 1,17 |
| A_09_P058261 | CG30380   | -                                                   | FBgn0050380 | -                                                      | 2,08 | 1,22   | 1,17  | 1,99 |
| A_09_P054446 | CG3088    | -                                                   | FBgn0036015 | proteolysis                                            | 2,07 | 1,02   | 0,73  | 1,49 |
| A_09_P152045 | CG44251   | -                                                   | FBgn0265186 | -                                                      | 2,07 | 1,14   | 0,90  | 1,64 |
| A_09_P003231 | CG34211   | -                                                   | FBgn0085240 | -                                                      | 2,07 | 1,06   | 0,82  | 1,60 |
| A_09_P015191 | CG32284   | -                                                   | FBgn0052284 | chitin metabolic process                               | 2,07 | 1,45   | 1,04  | 1,48 |
| A_09_P026631 | CG13526   | -                                                   | FBgn0034774 | -                                                      | 2,06 | 0,91   | 0,74  | 1,68 |
| A_09_P144890 | CG12012   | -                                                   | FBgn0035444 | -                                                      | 2,06 | 1,51   | 1,07  | 1,46 |
| A_09_P053661 | PGRP-SD   | PGRP-SD                                             | FBgn0035806 | immune response                                        | 2,05 | 2,41   | 3,47  | 2,95 |
| A_09_P129460 | CG8197    | -                                                   | FBgn0033369 | neurogenesis                                           | 2,04 | 0,86   | 0,80  | 1,91 |
| A_09_P111940 | CG10352   | -                                                   | FBgn0030348 | -                                                      | 2,04 | 1,43   | 1,02  | 1,46 |
| A_09_P128985 | CG32109   | -                                                   | FBgn0052109 | -                                                      | 2,04 | 2,10   | 0,94  | 0,91 |
| A_09_P041416 | PPO1      | Prophenoloxidase 1                                  | FBgn0261362 | defense response to Gram-positive bacterium            | 2,04 | 2,44   | 1,67  | 1,39 |
| A_09_P019126 | CG43773   | -                                                   | FBgn0264295 | -                                                      | 2,03 | 1,57   | 0,80  | 1,03 |
| A_09_P035756 | CG11426   | -                                                   | FBgn0037166 | dephosphorylation                                      | 2,03 | 1,12   | 0,98  | 1,78 |
| A_09_P055911 | CG13482   | -                                                   | FBgn0036419 | -                                                      | 2,03 | 1,49   | 0,78  | 1,06 |
| A_09_P010081 | Yp3       | Yolk protein 3                                      | FBgn0004047 | vitellogenesis                                         | 2,02 | 1,48   | 0,90  | 1,23 |
| A_09_P060361 | CG31664   | -                                                   | FBgn0051664 | -                                                      | 2,02 | 2,59   | 2,13  | 1,66 |
| A_09_P079686 | CG4757    | -                                                   | FBgn0027584 | -                                                      | 2,01 | 3,33   | 2,80  | 1,69 |
| A_09_P121665 | CG16836   | -                                                   | FBgn0040735 | -                                                      | 2,00 | 3,99   | 1,95  | 0,98 |
| A_09_P067236 | CG15784   | -                                                   | FBgn0029766 | -                                                      | 2,00 | 1,99   | 1,40  | 1,40 |

Repressed in *Die*<sup>1</sup> mutant non infected

|              |            |                          |             |                                  |      |      |      |      |
|--------------|------------|--------------------------|-------------|----------------------------------|------|------|------|------|
| A_09_P062366 | lectin-28C | lectin-28C               | FBgn0040099 | -                                | 0,07 | 2,39 | 2,59 | 0,07 |
| A_09_P018296 | CG10869    | -                        | FBgn0031347 | -                                | 0,10 | 0,54 | 1,34 | 0,25 |
| A_09_P043321 | Lcp1       | Larval cuticle protein 1 | FBgn0002531 | chitin-based cuticle development | 0,11 | 0,98 | 0,63 | 0,07 |

Table S1: List of genes induced and repressed in non infected die 1 mutant flies

|              |              |                                                  |             |                                                                         |      |        |        |      |
|--------------|--------------|--------------------------------------------------|-------------|-------------------------------------------------------------------------|------|--------|--------|------|
| A_09_P137560 | CG6484       | -                                                | FBgn0034247 | transmembrane transport                                                 | 0,12 | 1,38   | 1,00   | 0,09 |
| A_09_P170880 | RhoGAP100F   | Rho GTPase activating protein at 100F            | FBgn0039883 | synaptic vesicle localization                                           | 0,13 | 0,84   | 0,85   | 0,13 |
| A_09_P072161 | CG17192      | -                                                | FBgn0039472 | lipid catabolic process                                                 | 0,14 | 0,74   | 1,27   | 0,24 |
| A_09_P147255 | CG4398       | -                                                | FBgn0034126 | -                                                                       | 0,15 | 1,41   | 1,87   | 0,20 |
| A_09_P022396 | Vha68-3      | Vacuolar H <sup>+</sup> ATPase 68kD subunit 3    | FBgn0032464 | ATP metabolic process                                                   | 0,15 | 0,64   | 0,86   | 0,21 |
| A_09_P062376 | lectin-24A   | lectin-24A                                       | FBgn0040104 | -                                                                       | 0,16 | 1,49   | 7,12   | 0,77 |
| A_09_P032116 | sfl          | sulfateless                                      | FBgn0020251 | Wnt signaling pathway                                                   | 0,17 | 1,05   | 1,00   | 0,16 |
| A_09_P074191 | CG4830       | -                                                | FBgn0037996 | metabolic process                                                       | 0,19 | 0,51   | 0,95   | 0,35 |
| A_09_P192645 | CG42847      | -                                                | FBgn0262036 | -                                                                       | 0,19 | 0,75   | 0,87   | 0,22 |
| A_09_P217215 | CG14957      | -                                                | FBgn0035412 | chitin metabolic process                                                | 0,19 | 1,68   | 0,79   | 0,09 |
| A_09_P028306 | CG12090      | -                                                | FBgn0035227 | -                                                                       | 0,20 | 1,08   | 0,94   | 0,17 |
| A_09_P042926 | Jon44E       | Jonah 44E                                        | FBgn0001285 | proteolysis                                                             | 0,20 | 1,11   | 0,96   | 0,18 |
| A_09_P078756 | Fie          | Fire exit                                        | FBgn0026592 | -                                                                       | 0,20 | 1,02   | 0,97   | 0,19 |
| A_09_P020981 | CG9515       | -                                                | FBgn0032077 | -                                                                       | 0,21 | 1,40   | 1,27   | 0,19 |
| A_09_P058781 | CG31030      | -                                                | FBgn0051030 | ATP hydrolysis coupled proton transport                                 | 0,26 | 0,88   | 0,98   | 0,29 |
| A_09_P010541 | LysB         | Lysozyme B                                       | FBgn0004425 | antimicrobial humoral response                                          | 0,26 | 0,93   | 0,78   | 0,22 |
| A_09_P020401 | Cyp4d21      | Cyp4d21                                          | FBgn0031925 | oxidation-reduction process                                             | 0,29 | 1,04   | 1,39   | 0,39 |
| A_09_P111285 | CG9259       | -                                                | FBgn0032913 | -                                                                       | 0,30 | 0,88   | 1,02   | 0,34 |
| A_09_P028151 | CG13907      | -                                                | FBgn0035173 | transmembrane transport                                                 | 0,30 | 1,02   | 1,10   | 0,32 |
| A_09_P032651 | Jon25Bi      | Jonah 25Bi                                       | FBgn0020906 | proteolysis                                                             | 0,32 | 0,93   | 1,23   | 0,42 |
| A_09_P015131 | CG32267      | -                                                | FBgn0052267 | -                                                                       | 0,32 | 1,06   | 0,99   | 0,30 |
| A_09_P007686 | Oaz          | O/E-associated zinc finger protein               | FBgn0261613 | spiracle morphogenesis, open tracheal system                            | 0,34 | 0,56   | 0,67   | 0,41 |
| A_09_P030671 | Rala         | Ras-like protein A                               | FBgn0015286 | innate immune response                                                  | 0,34 | 1,13   | 1,03   | 0,31 |
| A_09_P203445 | CG14499      | -                                                | FBgn0034317 | -                                                                       | 0,35 | 2,54   | 1,75   | 0,24 |
| A_09_P034876 | lr76b        | Ionotropic receptor 76b                          | FBgn0036937 | cellular response to salt                                               | 0,35 | 0,54   | 0,75   | 0,49 |
| A_09_P008251 | Tsf3         | Transferrin 3                                    | FBgn0034094 | response to bacterium                                                   | 0,36 | 1,48   | 1,40   | 0,34 |
| A_09_P148025 | FucTD        | FucTD                                            | FBgn0035217 | protein glycosylation                                                   | 0,36 | 0,77   | 0,99   | 0,46 |
| A_09_P061721 | CG11550      | -                                                | FBgn0039864 | -                                                                       | 0,37 | 0,88   | 1,07   | 0,44 |
| A_09_P007056 | CG12374      | -                                                | FBgn0033774 | proteolysis                                                             | 0,37 | 0,63   | 0,74   | 0,44 |
| A_09_P053136 | Jon65Aii     | Jonah 65Aii                                      | FBgn0035666 | proteolysis                                                             | 0,37 | 0,94   | 0,64   | 0,25 |
| A_09_P149115 | RpL17        | Ribosomal protein L17                            | FBgn0029897 | mitotic spindle organization                                            | 0,38 | 1,11   | 1,01   | 0,35 |
| A_09_P008081 | CG8299       | -                                                | FBgn0034052 | proteolysis                                                             | 0,39 | 0,72   | 1,07   | 0,58 |
| A_09_P006826 | CG13155      | -                                                | FBgn0033723 | -                                                                       | 0,39 | 1,35   | 1,15   | 0,33 |
| A_09_P010556 | LysE         | Lysozyme E                                       | FBgn0004428 | antimicrobial humoral response                                          | 0,41 | 1,16   | 0,79   | 0,28 |
| A_09_P063696 | CG15213      | -                                                | FBgn0040843 | -                                                                       | 0,41 | 1,07   | 0,85   | 0,33 |
| A_09_P000766 | His4:CG33891 | His4:CG33891                                     | FBgn0053891 | nucleosome assembly                                                     | 0,41 | 0,49   | 0,69   | 0,58 |
| A_09_P015161 | CG32278      | -                                                | FBgn0052278 | -                                                                       | 0,42 | 1,04   | 1,06   | 0,43 |
| A_09_P022456 | CG5458       | -                                                | FBgn0032478 | -                                                                       | 0,42 | 0,71   | 0,97   | 0,58 |
| A_09_P030521 | Cyp4e1       | Cytochrome P450-4e1                              | FBgn0015034 | oxidation-reduction process                                             | 0,42 | 0,94   | 1,07   | 0,48 |
| A_09_P033901 | rogdi        | rogdi                                            | FBgn0036697 | olfactory learning                                                      | 0,42 | 0,57   | 0,76   | 0,57 |
| A_09_P058216 | CG30371      | -                                                | FBgn0050371 | proteolysis                                                             | 0,46 | 1,14   | 0,92   | 0,37 |
| A_09_P140170 | ND-B14       | NADH dehydrogenase (ubiquinone) B14 subunit      | FBgn0033570 | mitochondrial electron transport, NADH to ubiquinone                    | 0,43 | 1,09   | 0,91   | 0,36 |
| A_09_P061851 | Syt7         | Synaptotagmin 7                                  | FBgn0039900 | exocytosis                                                              | 0,44 | 0,95   | 1,11   | 0,51 |
| A_09_P053151 | CG10472      | -                                                | FBgn0035670 | proteolysis                                                             | 0,44 | 0,78   | 0,70   | 0,40 |
| A_09_P064576 | CG18814      | -                                                | FBgn0042137 | oxidation-reduction process                                             | 0,45 | 1,07   | 1,08   | 0,45 |
| A_09_P215770 | Jon65Aiv     | Jonah 65Aiv                                      | FBgn0250815 | proteolysis                                                             | 0,45 | 0,92   | 0,90   | 0,44 |
| A_09_P177020 | CG33235      | -                                                | FBgn0030307 | -                                                                       | 0,45 | 0,56   | 0,72   | 0,57 |
| A_09_P053566 | CG8560       | -                                                | FBgn0035781 | proteolysis                                                             | 0,45 | 0,82   | 0,87   | 0,48 |
| A_09_P112630 | CG18301      | -                                                | FBgn0032265 | lipid metabolic process                                                 | 0,47 | 0,87   | 1,10   | 0,59 |
| A_09_P060931 | CG2010       | -                                                | FBgn0039667 | SCF-dependent proteasomal ubiquitin-dependent protein catabolic process | 0,47 | 1,04   | 0,90   | 0,41 |
| A_09_P019386 | Jon25Bii     | Jonah 25Bii                                      | FBgn0031654 | proteolysis                                                             | 0,47 | 1,02   | 1,10   | 0,51 |
| A_09_P067501 | CG5928       | -                                                | FBgn0029836 | -                                                                       | 0,47 | 0,80   | 1,01   | 0,60 |
| A_09_P025106 | CG14759      | -                                                | FBgn0033278 | -                                                                       | 0,47 | 0,88   | 0,72   | 0,39 |
| A_09_P029371 | Dsp1         | Dorsal switch protein 1                          | FBgn0011764 | chromatin remodeling                                                    | 0,47 | 0,59   | 0,65   | 0,52 |
| A_09_P064951 | TotA         | Turandot A                                       | FBgn0028396 | response to bacterium                                                   | 0,48 | 199,69 | 419,30 | 1,01 |
| A_09_P031021 | Acp76A       | Accessory gland protein 76A                      | FBgn0015586 | regulation of proteolysis                                               | 0,48 | 0,73   | 1,18   | 0,77 |
| A_09_P066296 | Spn28F       | Serpin 28F                                       | FBgn0028987 | regulation of proteolysis                                               | 0,48 | 0,78   | 1,09   | 0,68 |
| A_09_P007476 | DJ-1alpha    | DJ-1alpha                                        | FBgn0033885 | response to oxidative stress                                            | 0,48 | 0,88   | 0,92   | 0,51 |
| A_09_P217155 | CG6675       | -                                                | FBgn0032973 | lipid catabolic process                                                 | 0,48 | 0,63   | 1,24   | 0,96 |
| A_09_P137505 | Cyp4e3       | Cytochrome P450-4e3                              | FBgn0015035 | oxidation-reduction process                                             | 0,48 | 2,40   | 1,53   | 0,31 |
| A_09_P001931 | CG16984      | -                                                | FBgn0062517 | -                                                                       | 0,49 | 0,68   | 0,91   | 0,65 |
| A_09_P090700 | Gad1         | Glutamic acid decarboxylase 1                    | FBgn0004516 | neurotransmitter receptor metabolic process                             | 0,49 | 0,80   | 1,01   | 0,62 |
| A_09_P124240 | CG33230      | -                                                | FBgn0053230 | -                                                                       | 0,49 | 1,09   | 1,10   | 0,49 |
| A_09_P025351 | FANCI        | Fanconi anemia complementation group I homologue | FBgn0033354 | DNA repair                                                              | 0,50 | 0,67   | 0,78   | 0,58 |
| A_09_P177435 | CG13526      | -                                                | FBgn0034774 | -                                                                       | 0,50 | 0,86   | 1,02   | 0,59 |
| A_09_P061396 | Jon99Fii     | Jonah 99Fii                                      | FBgn0039777 | proteolysis                                                             | 0,50 | 0,93   | 1,14   | 0,61 |

Table S2: List of genes induced and repressed by SINV infection in WT and *die*<sup>1</sup> flies.Table S2: List of genes induced and repressed by SINV infection in WT and *die*<sup>1</sup> flies.

| Probe number                                                                      | SYMBOL       | Gene Name                                  | Flybase ID  | GO_Biological Process                               | WT SINV/non infected | <i>die</i> <sup>1</sup> SINV/Non infected | <i>die</i> <sup>1</sup> /WT non infected | <i>die</i> <sup>1</sup> /WT SINV |
|-----------------------------------------------------------------------------------|--------------|--------------------------------------------|-------------|-----------------------------------------------------|----------------------|-------------------------------------------|------------------------------------------|----------------------------------|
| <b>Induced (≥2 fold) by SINV infection in WT and <i>die</i><sup>1</sup> flies</b> |              |                                            |             |                                                     |                      |                                           |                                          |                                  |
| A_09_P064951                                                                      | TotA         | Turandot A                                 | FBtr0083971 | response to bacterium                               | 199,69               | 419,30                                    | 0,48                                     | 1,01                             |
| A_09_P019556                                                                      | TotM         | Turandot M                                 | FBtr0079073 | response to bacterium                               | 115,21               | 50,82                                     | 2,29                                     | 1,01                             |
| A_09_P056771                                                                      | TotC         | Turandot C                                 | FBtr0083972 | response to bacterium                               | 78,54                | 128,07                                    | 0,60                                     | 0,99                             |
| A_09_P057631                                                                      | CG30098      | -                                          | FBtr0087168 | defense response to Gram-positive bacterium         | 40,16                | 24,98                                     | 2,22                                     | 1,38                             |
| A_09_P069721                                                                      | TotB         | Turandot B                                 | FBtr0083973 | response to bacterium                               | 37,34                | 27,77                                     | 0,99                                     | 0,74                             |
| A_09_P022946                                                                      | CG6639       | -                                          | FBtr0081004 | proteolysis   NOT inferred from key residues        | 36,83                | 10,10                                     | 3,44                                     | 0,94                             |
| A_09_P022951                                                                      | CG18563      | -                                          | FBtr0300902 | proteolysis                                         | 23,56                | 9,77                                      | 2,28                                     | 0,95                             |
| A_09_P036621                                                                      | CG11459      | -                                          | FBtr0078623 | proteolysis                                         | 20,43                | 25,29                                     | 0,76                                     | 0,94                             |
| A_09_P056761                                                                      | TotX         | Turandot X                                 | FBtr0083985 | response to bacterium                               | 17,92                | 17,74                                     | 0,73                                     | 0,72                             |
| A_09_P056756                                                                      | TotZ         | Turandot Z                                 | FBtr0083974 | response to bacterium                               | 14,20                | 8,84                                      | 0,95                                     | 0,59                             |
| A_09_P025346                                                                      | CG13749      | -                                          | FBtr0300706 | -                                                   | 12,92                | 19,95                                     | 1,09                                     | 1,68                             |
| A_09_P018756                                                                      | CG3117       | -                                          | FBtr0300356 | proteolysis   NOT inferred from key residues        | 12,52                | 11,58                                     | 0,86                                     | 0,80                             |
| A_09_P057591                                                                      | CG30088      | -                                          | FBtr0273296 | proteolysis                                         | 10,41                | 15,26                                     | 0,99                                     | 1,45                             |
| A_09_P057606                                                                      | CG30091      | -                                          | FBtr0087277 | proteolysis                                         | 10,10                | 6,18                                      | 2,30                                     | 1,41                             |
| A_09_P058041                                                                      | CG30287      | -                                          | FBtr0071695 | proteolysis                                         | 9,53                 | 6,07                                      | 1,14                                     | 0,73                             |
| A_09_P071581                                                                      | CG11893      | -                                          | FBtr0084827 | wing disc development                               | 7,08                 | 3,16                                      | 1,32                                     | 0,59                             |
| A_09_P070001                                                                      | fit          | female-specific independent of transformer | FBtr0084153 | -                                                   | 6,87                 | 3,82                                      | 0,88                                     | 0,49                             |
| A_09_P076441                                                                      | Lip3         | Lip3                                       | FBtr0082771 | lipid metabolic process                             | 6,18                 | 2,17                                      | 1,99                                     | 0,70                             |
| A_09_P059791                                                                      | Npc2e        | Niemann-Pick type C-2e                     | FBtr0273369 | peptidoglycan recognition protein signaling pathway | 5,74                 | 2,58                                      | 1,77                                     | 0,80                             |
| A_09_P216700                                                                      | CG15369      | -                                          | FBtr0071309 | -                                                   | 5,68                 | 3,19                                      | 2,08                                     | 1,17                             |
| A_09_P026161                                                                      | CG42365      | -                                          | FBtr0299964 | -                                                   | 5,32                 | 3,13                                      | 1,25                                     | 0,74                             |
| A_09_P191735                                                                      | CG42362      | -                                          | FBtr0299961 | -                                                   | 5,28                 | 3,99                                      | 1,21                                     | 0,91                             |
| A_09_P005786                                                                      | CG1773       | -                                          | FBtr0088467 | proteolysis                                         | 4,84                 | 3,47                                      | 1,10                                     | 0,79                             |
| A_09_P060656                                                                      | Sid          | Stress induced DNase                       | FBtr0085307 | response to bacterium                               | 4,83                 | 3,95                                      | 1,31                                     | 1,07                             |
| A_09_P007646                                                                      | Arc2         | Arc2                                       | FBtr0087547 | -                                                   | 4,66                 | 2,32                                      | 2,35                                     | 1,17                             |
| A_09_P017611                                                                      | CG33460      | -                                          | FBtr0100642 | proteolysis                                         | 4,15                 | 3,46                                      | 1,46                                     | 1,22                             |
| A_09_P018421                                                                      | CG4259       | -                                          | FBtr0077854 | proteolysis   NOT inferred from key residues        | 4,13                 | 2,74                                      | 1,34                                     | 0,89                             |
| A_09_P013876                                                                      | CG31832      | -                                          | FBtr0080726 | -                                                   | 4,13                 | 2,87                                      | 0,59                                     | 0,41                             |
| A_09_P070621                                                                      | CG4408       | -                                          | FBtr0084431 | proteolysis                                         | 4,11                 | 2,12                                      | 1,28                                     | 0,66                             |
| A_09_P018751                                                                      | CG18557      | -                                          | FBtr0077689 | proteolysis   NOT inferred from key residues        | 4,05                 | 5,99                                      | 0,51                                     | 0,75                             |
| A_09_P056566                                                                      | PGRP-SB1     | PGRP-SB1                                   | FBtr0075348 | immune response                                     | 3,83                 | 4,60                                      | 3,80                                     | 4,57                             |
| A_09_P057576                                                                      | CG30083      | -                                          | FBtr0300381 | proteolysis                                         | 3,75                 | 2,48                                      | 1,52                                     | 1,01                             |
| A_09_P065881                                                                      | CG18477      | -                                          | FBtr0080756 | proteolysis   NOT inferred from key residues        | 3,67                 | 2,12                                      | 1,39                                     | 0,80                             |
| A_09_P065926                                                                      | NimC4        | Nimrod C4                                  | FBtr0080592 | phagocytosis                                        | 3,66                 | 2,10                                      | 1,75                                     | 1,00                             |
| A_09_P057301                                                                      | CG30002      | -                                          | FBtr0088466 | proteolysis                                         | 3,62                 | 3,25                                      | 0,91                                     | 0,82                             |
| A_09_P063056                                                                      | CG7763       | -                                          | FBtr0088135 | -                                                   | 3,50                 | 4,08                                      | 1,18                                     | 1,37                             |
| A_09_P079656                                                                      | CG14526      | -                                          | FBtr0301945 | proteolysis                                         | 3,41                 | 2,64                                      | 1,17                                     | 0,90                             |
| A_09_P135325                                                                      | CG14527      | -                                          | FBtr0336460 | proteolysis                                         | 3,40                 | 2,51                                      | 1,21                                     | 0,90                             |
| A_09_P101215                                                                      | edin         | elevated during infection                  | FBtr0075174 | immune response                                     | 3,36                 | 16,15                                     | 1,88                                     | 9,03                             |
| A_09_P202245                                                                      | CG7997       | -                                          | FBtr0087172 | oligosaccharide metabolic process                   | 3,30                 | 2,78                                      | 0,78                                     | 0,66                             |
| A_09_P007711                                                                      | CG12868      | -                                          | FBtr0301735 | -                                                   | 3,28                 | 2,20                                      | 1,32                                     | 0,89                             |
| A_09_P133305                                                                      | Cys          | Cystatin-like                              | FBtr0072487 | multicellular organism reproduction                 | 3,13                 | 2,42                                      | 1,17                                     | 0,90                             |
| A_09_P010831                                                                      | zfh1         | Zn finger homeodomain 1                    | FBtr0085701 | antimicrobial humoral response                      | 3,11                 | 2,14                                      | 1,39                                     | 0,96                             |
| A_09_P212320                                                                      | CG4250       | -                                          | FBtr0309802 | -                                                   | 3,10                 | 2,33                                      | 1,50                                     | 1,12                             |
| A_09_P037556                                                                      | Vago         | Vago                                       | FBtr0100644 | defense response to virus                           | 3,09                 | 2,04                                      | 1,74                                     | 1,15                             |
| A_09_P027001                                                                      | CG10332      | -                                          | FBtr0072109 | -                                                   | 3,08                 | 5,39                                      | 2,76                                     | 4,82                             |
| A_09_P030406                                                                      | Mtk          | Metchnikowin                               | FBtr0087386 | antimicrobial humoral response                      | 3,06                 | 4,70                                      | 4,02                                     | 6,17                             |
| A_09_P011881                                                                      | GstD2        | Glutathione S transferase D2               | FBtr0082569 | glutathione metabolic process                       | 3,06                 | 2,03                                      | 1,77                                     | 1,17                             |
| A_09_P144210                                                                      | CG34054      | -                                          | FBtr0100109 | -                                                   | 3,04                 | 2,05                                      | 1,55                                     | 1,05                             |
| A_09_P017981                                                                      | nAcRbeta-21C | nicotinic Acetylcholine Receptor β3        | FBtr0078065 | ion transport                                       | 3,00                 | 2,11                                      | 1,68                                     | 1,18                             |
| A_09_P045891                                                                      | DptB         | Diptericin B                               | FBtr0086621 | antimicrobial humoral response                      | 2,94                 | 6,36                                      | 4,79                                     | 10,36                            |
| A_09_P112520                                                                      | CG31664      | -                                          | FBtr0303377 | -                                                   | 2,87                 | 2,38                                      | 1,93                                     | 1,60                             |
| A_09_P052991                                                                      | mthl2        | methuselah-like 2                          | FBtr0077088 | G-protein coupled receptor signaling pathway        | 2,87                 | 2,18                                      | 2,31                                     | 1,75                             |
| A_09_P071301                                                                      | CG13641      | -                                          | FBtr0084729 | -                                                   | 2,85                 | 2,65                                      | 1,95                                     | 1,82                             |
| A_09_P075261                                                                      | CG6912       | -                                          | FBtr0083038 | -                                                   | 2,82                 | 2,55                                      | 1,29                                     | 1,16                             |
| A_09_P169575                                                                      | Tsf1         | Transferrin 1                              | FBtr0074559 | response to fungus                                  | 2,77                 | 2,58                                      | 1,19                                     | 1,11                             |
| A_09_P060181                                                                      | CG31606      | -                                          | FBtr0079577 | -                                                   | 2,68                 | 2,21                                      | 0,54                                     | 0,45                             |
| A_09_P111540                                                                      | CG9616       | -                                          | FBtr0300059 | -                                                   | 2,68                 | 2,01                                      | 1,16                                     | 0,87                             |
| A_09_P164825                                                                      | CG3397       | -                                          | FBtr0082504 | potassium ion transport                             | 2,67                 | 2,74                                      | 1,00                                     | 1,03                             |
| A_09_P015151                                                                      | Drs-I        | Drosomycin-like 1                          | FBtr0073081 | defense response to fungus                          | 2,63                 | 2,37                                      | 1,36                                     | 1,23                             |
| A_09_P130780                                                                      | Gnmt         | Glycine N-methyltransferase                | FBtr0082651 | triglyceride homeostasis                            | 2,58                 | 3,33                                      | 0,97                                     | 1,25                             |
| A_09_P167250                                                                      | GstE1        | Glutathione S transferase E1               | FBtr0086669 | response to oxidative stress                        | 2,57                 | 2,18                                      | 1,27                                     | 1,08                             |
| A_09_P007281                                                                      | IM10         | Immune induced molecule 10                 | FBtr0087655 | antibacterial humoral response                      | 2,56                 | 2,62                                      | 1,24                                     | 1,27                             |
| A_09_P061326                                                                      | CG9733       | -                                          | FBtr0085638 | proteolysis                                         | 2,56                 | 2,01                                      | 1,57                                     | 1,24                             |
| A_09_P006831                                                                      | CG8501       | -                                          | FBtr0087915 | -                                                   | 2,53                 | 2,05                                      | 1,39                                     | 1,13                             |
| A_09_P029506                                                                      | AttA         | Attacin-A                                  | FBtr0087437 | antimicrobial humoral response                      | 2,51                 | 7,82                                      | 1,73                                     | 5,39                             |
| A_09_P075311                                                                      | Spn88Eb      | Serin 88Eb                                 | FBtr0083140 | negative regulation of proteolysis                  | 2,49                 | 3,50                                      | 1,03                                     | 1,45                             |
| A_09_P064326                                                                      | AsnS         | Asparagine synthetase                      | FBtr0089463 | asparagine biosynthetic process                     | 2,45                 | 2,08                                      | 1,18                                     | 1,01                             |
| A_09_P034316                                                                      | Cyp12c1      | Cyp12c1                                    | FBtr0075091 | oxidation-reduction process                         | 2,44                 | 2,00                                      | 1,10                                     | 0,89                             |

Table S2: List of genes induced and repressed by SINV infection in WT and die<sub>1</sub> flies.

|                                                             |             |                                                       |             |                                                                                  |        |      |      |      |
|-------------------------------------------------------------|-------------|-------------------------------------------------------|-------------|----------------------------------------------------------------------------------|--------|------|------|------|
| A_09_P053661                                                | PGRP-SD     | PGRP-SD                                               | FBtr0076807 | defense response to Gram-positive bacterium                                      | 2,41   | 3,47 | 2,05 | 2,95 |
| A_09_P064281                                                | AttC        | Attacin-C                                             | FBtr0305795 | antibacterial humoral response                                                   | 2,37   | 5,82 | 1,94 | 4,77 |
| A_09_P187755                                                | CG11395     | -                                                     | FBtr0086987 | signal transduction                                                              | 2,36   | 2,05 | 1,12 | 0,98 |
| A_09_P025711                                                | GNBP-like3  | GNBP-like 3                                           | FBtr0086214 | response to fungus                                                               | 2,32   | 2,27 | 1,08 | 1,06 |
| A_09_P057376                                                | CG30026     | -                                                     | FBtr0300922 | -                                                                                | 2,29   | 2,17 | 1,16 | 1,10 |
| A_09_P064071                                                | TeplII      | Thioester-containing protein 2                        | FBtr0079510 | antibacterial humoral response                                                   | 2,28   | 2,72 | 0,61 | 0,73 |
| A_09_P164330                                                | CG6415      | -                                                     | FBtr0080108 | glycine catabolic process                                                        | 2,24   | 2,11 | 1,00 | 0,94 |
| A_09_P009861                                                | tsl         | torso-like                                            | FBtr0084164 | torso signaling pathway                                                          | 2,20   | 2,10 | 1,26 | 1,20 |
| A_09_P076236                                                | AttD        | Attacin-D                                             | FBtr0083470 | antibacterial humoral response                                                   | 2,18   | 2,93 | 2,52 | 3,39 |
| A_09_P209530                                                | GstD10      | Glutathione S transferase D10                         | FBtr0082609 | glutathione metabolic process                                                    | 2,15   | 2,39 | 0,94 | 1,04 |
| A_09_P023551                                                | CG13077     | -                                                     | FBtr0081257 | -                                                                                | 2,13   | 2,25 | 0,94 | 0,99 |
| A_09_P010311                                                | Dpt         | Diptericin                                            | FBtr0086620 | antibacterial humoral response                                                   | 2,09   | 6,79 | 2,42 | 7,87 |
| A_09_P025801                                                | CG16799     | -                                                     | FBtr0086249 | antimicrobial humoral response                                                   | 2,07   | 2,16 | 0,95 | 1,00 |
| A_09_P064286                                                | AttB        | Attacin-B                                             | FBtr0087438 | antibacterial humoral response                                                   | 2,06   | 5,27 | 1,85 | 4,73 |
| A_09_P075266                                                | CG3984      | -                                                     | FBtr0083025 | -                                                                                | 2,02   | 2,53 | 0,85 | 1,06 |
| <b>Induced (≥2 fold) by SINV infection only in WT flies</b> |             |                                                       |             |                                                                                  |        |      |      |      |
| A_09_P060926                                                | die         | Diedel                                                | FBtr0085426 | response to bacterium                                                            | 323,47 | 0,99 | 0,11 | 0,00 |
| A_09_P171285                                                | CG14499     | -                                                     | FBtr0347601 | -                                                                                | 7,03   | 1,86 | 0,65 | 0,17 |
| A_09_P121665                                                | CG16836     | -                                                     | FBtr0086666 | -                                                                                | 3,99   | 1,95 | 2,00 | 0,98 |
| A_09_P074491                                                | CG5999      | -                                                     | FBtr0302379 | metabolic process                                                                | 3,55   | 1,73 | 1,43 | 0,70 |
| A_09_P045336                                                | CG15067     | -                                                     | FBtr0300844 | neurogenesis                                                                     | 3,52   | 1,70 | 1,69 | 0,81 |
| A_09_P045161                                                | IM2         | Immune induced molecule 2                             | FBtr0086664 | response to bacterium                                                            | 3,33   | 1,93 | 2,10 | 1,22 |
| A_09_P022221                                                | CG16997     | Phaedra 2                                             | FBtr0302854 | proteolysis                                                                      | 3,22   | 1,12 | 3,03 | 1,05 |
| A_09_P015351                                                | CG32368     | -                                                     | FBtr0076749 | -                                                                                | 3,12   | 1,07 | 5,58 | 1,92 |
| A_09_P063316                                                | IM4         | Immune induced molecule 4                             | FBtr0071559 | response to bacterium                                                            | 3,10   | 1,88 | 1,80 | 1,09 |
| A_09_P033651                                                | CG4680      | Gag-related                                           | FBtr0075388 | -                                                                                | 2,75   | 1,49 | 1,88 | 1,02 |
| A_09_P033466                                                | CG4950      | -                                                     | FBtr0290260 | -                                                                                | 2,70   | 1,77 | 1,67 | 1,10 |
| A_09_P017646                                                | CG33468     | -                                                     | FBtr0087503 | -                                                                                | 2,66   | 1,94 | 1,41 | 1,03 |
| A_09_P052171                                                | Cyp4e3      | Cytochrome P450-4e3                                   | FBtr0079925 | oxidation-reduction process                                                      | 2,64   | 1,65 | 0,58 | 0,36 |
| A_09_P009081                                                | IM1         | Immune induced molecule 1                             | FBtr0086662 | response to bacterium                                                            | 2,59   | 1,88 | 1,57 | 1,14 |
| A_09_P009086                                                | CG18107     | -                                                     | FBtr0086663 | -                                                                                | 2,59   | 1,51 | 1,88 | 1,09 |
| A_09_P063186                                                | CG5791      | -                                                     | FBtr0084180 | -                                                                                | 2,57   | 1,61 | 1,52 | 0,95 |
| A_09_P025411                                                | CG8193      | Prophenoloxidase 2                                    | FBtr0088663 | defense response to Gram-positive bacterium                                      | 2,57   | 1,98 | 2,10 | 1,62 |
| A_09_P000201                                                | lectin-37Da | lectin-37Da                                           | FBtr0091498 | calcium-dependent cell-cell adhesion via plasma membrane cell adhesion molecules | 2,53   | 1,13 | 1,95 | 0,87 |
| A_09_P128140                                                | PGRP-SA     | Peptidoglycan recognition protein SA                  | FBtr0073509 | defense response to Gram-positive bacterium                                      | 2,52   | 1,54 | 2,83 | 1,73 |
| A_09_P012026                                                | Nmdmc       | NAD-dependent methylenetetrahydrofolate dehydrogenase | FBtr0081996 | oxidation-reduction process                                                      | 2,49   | 1,80 | 1,80 | 1,30 |
| A_09_P055856                                                | upSET       | upSET                                                 | FBtr0075768 | establishment of chromatin silencing                                             | 2,53   | 1,65 | 1,11 | 0,73 |
| A_09_P115030                                                | lectin-28C  | lectin-28C                                            | FBtr0343418 | -                                                                                | 2,47   | 1,56 | 0,09 | 0,06 |
| A_09_P043376                                                | Lsp2        | Larval serum protein 2                                | FBtr0089324 | synaptic target inhibition                                                       | 2,46   | 1,42 | 1,11 | 0,64 |
| A_09_P026576                                                | Cyp6d2      | Cyp6d2                                                | FBtr0071928 | oxidation-reduction process                                                      | 2,45   | 1,62 | 1,53 | 1,02 |
| A_09_P041416                                                | PPO1        | Prophenoloxidase 1                                    | FBtr0302291 | defense response to Gram-positive bacterium                                      | 2,44   | 1,67 | 2,04 | 1,39 |
| A_09_P141245                                                | Cyp309a1    | Cyp309a1                                              | FBtr0077749 | oxidation-reduction process                                                      | 2,40   | 1,75 | 1,12 | 0,82 |
| A_09_P063476                                                | IM3         | Immune induced molecule 3                             | FBtr0086665 | antibacterial humoral response                                                   | 2,39   | 1,58 | 1,77 | 1,17 |
| A_09_P025161                                                | CG8693      | Maltase A4                                            | FBtr0088748 | carbohydrate metabolic process                                                   | 2,38   | 1,42 | 0,70 | 0,42 |
| A_09_P213940                                                | CG15068     | -                                                     | FBtr0086727 | -                                                                                | 2,38   | 1,31 | 1,50 | 0,82 |
| A_09_P007636                                                | Arc1        | Activity-regulated cytoskeleton associated protein 1  | FBtr0087560 | behavioral response to starvation                                                | 2,37   | 1,84 | 1,27 | 0,98 |
| A_09_P073141                                                | Fst         | Frost                                                 | FBtr0082101 | response to cold                                                                 | 2,37   | 1,33 | 3,11 | 1,75 |
| A_09_P053606                                                | CG8539      | -                                                     | FBtr0076831 | proteolysis                                                                      | 2,37   | 1,87 | 1,26 | 1,00 |
| A_09_P057601                                                | CG30090     | -                                                     | FBtr0087279 | proteolysis                                                                      | 2,37   | 1,98 | 1,26 | 1,05 |
| A_09_P045976                                                | Socs36E     | Suppressor of cytokine signaling at 36E               | FBtr0081040 | negative regulation of JAK-STAT cascade                                          | 2,36   | 1,52 | 2,00 | 1,28 |
| A_09_P037576                                                | CG11122     | -                                                     | FBtr0073481 | -                                                                                | 2,34   | 1,74 | 0,94 | 0,70 |
| A_09_P019961                                                | CG42370     | -                                                     | FBtr0299969 | proteolysis                                                                      | 2,32   | 1,62 | 0,86 | 0,60 |
| A_09_P031241                                                | Rab19       | Rab19                                                 | FBtr0076705 | vesicle-mediated transport                                                       | 2,30   | 1,06 | 2,13 | 0,99 |
| A_09_P062371                                                | lectin-24Db | lectin-24Db                                           | FBtr0077469 | -                                                                                | 2,29   | 1,61 | 1,51 | 1,06 |
| A_09_P075866                                                | Der-2       | Derlin-2                                              | FBtr0083307 | defense response to bacterium                                                    | 2,27   | 1,05 | 2,26 | 1,04 |
| A_09_P019376                                                | jet         | jetlag                                                | FBtr0079057 | circadian behavior                                                               | 2,27   | 1,05 | 1,87 | 0,87 |
| A_09_P153830                                                | CG33470     | -                                                     | FBtr0087656 | -                                                                                | 2,24   | 1,99 | 2,24 | 1,99 |
| A_09_P007351                                                | CG42807     | -                                                     | FBtr0303819 | -                                                                                | 2,24   | 1,26 | 5,48 | 3,08 |
| A_09_P056666                                                | Spn43Ad     | Serpin 43Ad                                           | FBtr0089053 | -                                                                                | 2,23   | 1,67 | 1,84 | 1,38 |
| A_09_P011906                                                | GstD7       | Glutathione S transferase D7                          | FBtr0082574 | glutathione metabolic process                                                    | 2,22   | 1,74 | 0,84 | 0,66 |
| A_09_P054056                                                | Zasp66      | Z band alternatively spliced PDZ-motif protein 66     | FBtr0089564 | myofibril assembly                                                               | 2,22   | 1,65 | 1,24 | 0,92 |
| A_09_P065406                                                | NimC1       | -                                                     | FBtr0080615 | phagocytosis                                                                     | 2,21   | 1,78 | 1,61 | 1,30 |
| A_09_P053696                                                | CG7409      | -                                                     | FBtr0076810 | protein folding                                                                  | 2,20   | 0,96 | 1,67 | 0,73 |
| A_09_P065391                                                | NimB4       | Nimrod B4                                             | FBtr0080617 | defense response to bacterium                                                    | 2,17   | 1,77 | 1,17 | 0,96 |
| A_09_P102720                                                | spen        | split ends                                            | FBtr0078121 | Wnt signaling pathway                                                            | 2,17   | 1,19 | 1,16 | 0,63 |

Table S2: List of genes induced and repressed by SINV infection in WT and *die*<sup>1</sup> flies.

|                                                                                                          |            |                                    |             |                                            |      |      |      |      |
|----------------------------------------------------------------------------------------------------------|------------|------------------------------------|-------------|--------------------------------------------|------|------|------|------|
| A_09_P007231                                                                                             | CG10799    | -                                  | FBtr0087748 | -                                          | 2,16 | 1,80 | 0,89 | 0,74 |
| A_09_P014436                                                                                             | A2bp1      | Ataxin-2 binding protein 1         | FBtr0305093 | nervous system development                 | 2,16 | 0,99 | 1,93 | 0,88 |
| A_09_P061016                                                                                             | Obp99b     | Odorant-binding protein 99b        | FBtr0085462 | sensory perception of chemical stimulus    | 2,16 | 0,92 | 1,54 | 0,65 |
| A_09_P036451                                                                                             | CG12171    | -                                  | FBtr0078708 | metabolic process                          | 2,15 | 1,50 | 1,17 | 0,82 |
| A_09_P007721                                                                                             | CG10131    | -                                  | FBtr0087499 | oxidation-reduction process                | 2,13 | 1,76 | 1,54 | 1,27 |
| A_09_P042026                                                                                             | DNasell    | Deoxyribonuclease II               | FBtr0083538 | DNA metabolic process                      | 2,13 | 1,72 | 1,18 | 0,95 |
| A_09_P017651                                                                                             | CG33469    | -                                  | FBtr0087504 | -                                          | 2,13 | 1,41 | 1,59 | 1,05 |
| A_09_P178620                                                                                             | CG3011     | -                                  | FBtr0290235 | behavioral response to ethanol             | 2,12 | 1,83 | 1,11 | 0,95 |
| A_09_P055116                                                                                             | CG10361    | -                                  | FBtr0076084 | cellular amino acid metabolic process      | 2,12 | 1,74 | 1,52 | 1,25 |
| A_09_P207753                                                                                             | Obp99c     | Odorant-binding protein 99c        | FBtr0085463 | sensory perception of chemical stimulus    | 2,12 | 1,66 | 1,15 | 0,91 |
| A_09_P217000                                                                                             | CG13794    | -                                  | FBtr0079507 | neurotransmitter transport                 | 2,11 | 1,91 | 1,43 | 1,29 |
| A_09_P032386                                                                                             | Fak        | Focal adhesion kinase              | FBtr0086542 | negative regulation of MAP kinase activity | 2,11 | 0,89 | 2,18 | 0,92 |
| A_09_P170745                                                                                             | Ten-m      | Tenascin major                     | FBtr0078509 | synaptic target attraction                 | 2,11 | 1,73 | 1,29 | 1,06 |
| A_09_P107605                                                                                             | Karl       | Karl                               | FBtr0073557 | imaginal disc-derived wing morphogenesis   | 2,10 | 1,61 | 1,69 | 1,29 |
| A_09_P128985                                                                                             | CG32109    | -                                  | FBtr0075918 | -                                          | 2,10 | 0,94 | 2,04 | 0,91 |
| A_09_P197075                                                                                             | Gadd45     | Gadd45                             | FBtr0089049 | JNK cascade                                | 2,09 | 1,38 | 1,65 | 1,09 |
| A_09_P035981                                                                                             | CG1092     | -                                  | FBtr0078978 | neurogenesis                               | 2,07 | 1,63 | 1,32 | 1,04 |
| A_09_P048106                                                                                             | CG4716     | -                                  | FBtr0087746 | -                                          | 2,07 | 1,94 | 0,93 | 0,88 |
| A_09_P055431                                                                                             | ver        | verrocchio                         | FBtr0075960 | neurogenesis                               | 2,07 | 1,48 | 1,14 | 0,81 |
| A_09_P008416                                                                                             | CG4927     | -                                  | FBtr0100547 | proteolysis                                | 2,07 | 1,41 | 1,18 | 0,80 |
| A_09_P059146                                                                                             | CG31148    | -                                  | FBtr0084441 | cellular response to unfolded protein      | 2,07 | 1,88 | 1,33 | 1,22 |
| A_09_P189400                                                                                             | Eip93F     | Ecdysone-induced protein 93F       | FBtr0084169 | autophagy                                  | 2,07 | 1,35 | 1,15 | 0,75 |
| A_09_P057206                                                                                             | Obp83cd    | Odorant-binding protein 83cd       | FBtr0078584 | sensory perception of chemical stimulus    | 2,06 | 1,61 | 1,11 | 0,87 |
| A_09_P060461                                                                                             | CG31694    | -                                  | FBtr0077685 | positive regulation of JAK-STAT cascade    | 2,06 | 1,90 | 0,95 | 0,88 |
| A_09_P199445                                                                                             | CG33307    | -                                  | FBtr0080565 | -                                          | 2,05 | 1,53 | 1,11 | 0,83 |
| A_09_P007456                                                                                             | CG6553     | -                                  | FBtr0087642 | -                                          | 2,04 | 1,66 | 0,99 | 0,80 |
| A_09_P057746                                                                                             | CG30148    | -                                  | FBtr0086266 | -                                          | 2,04 | 1,84 | 1,90 | 1,72 |
| A_09_P009171                                                                                             | CG5493     | -                                  | FBtr0086713 | oxidation-reduction process                | 2,02 | 1,43 | 1,40 | 0,98 |
| A_09_P113980                                                                                             | CG14659    | -                                  | FBtr0078873 | -                                          | 2,02 | 0,84 | 1,91 | 0,79 |
| A_09_P219880                                                                                             | Gel        | Gelsolin                           | FBtr0078969 | phagocytosis                               | 2,02 | 1,79 | 1,04 | 0,92 |
| A_09_P046041                                                                                             | Hn         | Henna                              | FBtr0100225 | phagocytosis                               | 2,02 | 1,78 | 0,94 | 0,83 |
| A_09_P166370                                                                                             | pncr016:2R | putative noncoding                 | FBtr0091953 | -                                          | 2,01 | 1,16 | 1,41 | 0,81 |
| A_09_P170670                                                                                             | Sr-CI      | Scavenger receptor class C, type I | FBtr0077467 | phagocytosis                               | 2,01 | 1,33 | 2,11 | 1,40 |
| A_09_P009016                                                                                             | CG10916    | -                                  | FBtr0086749 | determination of adult lifespan            | 2,01 | 1,46 | 1,66 | 1,21 |
| A_09_P062776                                                                                             | CG3699     | -                                  | FBtr0070186 | metabolic process                          | 2,01 | 1,01 | 0,85 | 0,43 |
| A_09_P147180                                                                                             | Npc2h      | Niemann-Pick type C-2h             | FBtr0085722 | hemolymph coagulation                      | 2,01 | 1,51 | 0,81 | 0,61 |
| A_09_P002051                                                                                             | ldgf5      | Imaginal disc growth factor 5      | FBtr0086668 | chitin catabolic process                   | 2,00 | 1,60 | 1,40 | 1,11 |
| A_09_P160105                                                                                             | CG2233     | -                                  | FBtr0071123 | -                                          | 2,00 | 1,37 | 1,56 | 1,06 |
| <b>Induced (<math>\geq 2</math> fold) by SINV infection only in <i>die</i><sup>1</sup> mutants</b>       |            |                                    |             |                                            |      |      |      |      |
| A_09_P062376                                                                                             | lectin-24A | lectin-24A                         | FBtr0077539 | -                                          | 1,49 | 7,12 | 0,16 | 0,77 |
| A_09_P219460                                                                                             | CecA2      | Cecropin A2                        | FBtr0085614 | antibacterial humoral response             | 1,82 | 4,32 | 1,29 | 3,04 |
| A_09_P079521                                                                                             | CG2217     | -                                  | FBtr0085630 | -                                          | 1,68 | 2,87 | 0,62 | 1,07 |
| A_09_P061546                                                                                             | CG15553    | -                                  | FBtr0290201 | transmembrane transport                    | 1,91 | 2,78 | 1,49 | 2,16 |
| A_09_P041636                                                                                             | CecC       | Cecropin C                         | FBtr0085616 | antibacterial humoral response             | 1,89 | 2,38 | 4,33 | 5,48 |
| A_09_P074121                                                                                             | Ect3       | Ectoderm-expressed 3               | FBtr0082487 | autophagic cell death                      | 1,45 | 2,38 | 1,51 | 2,48 |
| A_09_P012336                                                                                             | Drs        | Drosomycin                         | FBtr0073073 | antifungal humoral response                | 1,65 | 2,33 | 1,22 | 1,72 |
| A_09_P079551                                                                                             | CG6495     | -                                  | FBtr0080114 | -                                          | 1,95 | 2,24 | 0,99 | 1,14 |
| A_09_P010041                                                                                             | wb         | wing blister                       | FBtr0302731 | imaginal disc-derived wing morphogenesis   | 1,66 | 2,16 | 1,22 | 1,60 |
| A_09_P040616                                                                                             | et         | eye transformer                    | FBtr0074757 | negative regulation of JAK-STAT cascade    | 1,66 | 2,11 | 1,03 | 1,32 |
| A_09_P067431                                                                                             | CG4020     | -                                  | FBtr0070824 | -                                          | 1,53 | 2,05 | 0,77 | 1,04 |
| A_09_P004656                                                                                             | CG40801    | -                                  | FBtr0113933 | -                                          | 1,78 | 2,05 | 1,12 | 1,29 |
| A_09_P181540                                                                                             | CG3246     | -                                  | FBtr0077572 | -                                          | 1,80 | 2,02 | 0,93 | 1,04 |
| A_09_P006346                                                                                             | Listericin | Listericin                         | FBtr0088191 | defense response to bacterium              | 1,64 | 2,00 | 1,17 | 1,42 |
| <b>Repressed (<math>\leq 0,5</math> fold) by SINV infection in WT and <i>die</i><sup>1</sup> mutants</b> |            |                                    |             |                                            |      |      |      |      |
| A_09_P043366                                                                                             | Lsp1beta   | Larval serum protein 1 beta        | FBgn0002563 | lateral inhibition                         | 0,31 | 0,45 | 0,95 | 1,35 |
| <b>Repressed (<math>\leq 0,5</math>) by SINV infection only in WT</b>                                    |            |                                    |             |                                            |      |      |      |      |
| A_09_P026876                                                                                             | CG9861     | -                                  | FBgn0034844 | -                                          | 0,44 | 0,89 | 0,64 | 1,28 |
| A_09_P167915                                                                                             | CG4836     | -                                  | FBgn0270925 | oxidation-reduction process                | 0,46 | 0,78 | 0,61 | 1,04 |
| A_09_P016281                                                                                             | Erk7       | Extracellularly regulated kinase 7 | FBgn0052703 | cellular response to amino acid starvation | 0,46 | 0,71 | 0,66 | 1,02 |
| A_09_P026816                                                                                             | Klp59D     | Kinesin-like protein at 59D        | FBgn0034827 | microtubule-based movement                 | 0,46 | 0,81 | 0,67 | 1,19 |
| A_09_P019016                                                                                             | CG3213     | -                                  | FBgn0031545 | -                                          | 0,46 | 0,76 | 0,58 | 0,96 |
| A_09_P056826                                                                                             | CG33992    | -                                  | FBgn0264086 | -                                          | 0,47 | 0,76 | 0,63 | 1,02 |
| A_09_P026546                                                                                             | CG4329     | -                                  | FBgn0034745 | sensory perception of sound                | 0,47 | 0,77 | 0,68 | 1,11 |
| A_09_P029441                                                                                             | Pen        | Pendulin                           | FBgn0267727 | cytoplasmic transport                      | 0,48 | 0,76 | 0,66 | 1,04 |
| A_09_P025481                                                                                             | CG16716    | -                                  | FBgn0034459 | cellular protein modification process      | 0,48 | 0,77 | 0,64 | 1,04 |
| A_09_P074866                                                                                             | CG9297     | -                                  | FBgn0038181 | calcium ion transport                      | 0,48 | 0,65 | 0,83 | 1,12 |
| A_09_P019236                                                                                             | CG15635    | -                                  | FBgn0031617 | multicellular organism reproduction        | 0,49 | 0,56 | 0,70 | 0,81 |
| A_09_P068846                                                                                             | hmw        | hemingway                          | FBgn0038607 | spermatogenesis                            | 0,49 | 0,76 | 0,68 | 1,07 |
| A_09_P065951                                                                                             | CG4892     | -                                  | FBgn0028884 | -                                          | 0,49 | 0,77 | 0,78 | 1,22 |
| A_09_P136850                                                                                             | CG4945     | -                                  | FBtr0087100 | protein phosphorylation                    | 0,50 | 0,83 | 0,90 | 1,12 |
| A_09_P029571                                                                                             | Hsp70Aa    | Heat-shock-protein-70Aa            | FBtr0082512 | response to heat                           | 0,50 | 0,76 | 0,68 | 1,18 |

Table S2: List of genes induced and repressed by SINV infection in WT and *die1* flies.

| Repressed ( $\leq 0.5$ fold) by SINV infection only in <i>die1</i> mutants |           |                             |             |                                         |      |      |      |      |
|----------------------------------------------------------------------------|-----------|-----------------------------|-------------|-----------------------------------------|------|------|------|------|
| A_09_P192275                                                               | Cyp4g1    | Cytochrome P450-4g1         | FBgn0010019 | lipid metabolic process                 | 0,62 | 0,47 | 0,87 | 0,66 |
| A_09_P113025                                                               | Cpr67Fb   | Cuticular protein 67Fb      | FBgn0036110 | multicellular organism reproduction     | 0,70 | 0,48 | 1,83 | 1,25 |
| A_09_P045821                                                               | Strn-Mlck | Stretchin-Mlck              | FBgn0265045 | protein phosphorylation                 | 0,63 | 0,49 | 1,00 | 0,78 |
| A_09_P068471                                                               | CG12057   | -                           | FBgn0030098 | -                                       | 0,83 | 0,49 | 1,11 | 0,66 |
| A_09_P171760                                                               | CG34324   | -                           | FBtr0112526 | chitin metabolic process                | 0,65 | 0,50 | 0,86 | 0,68 |
| A_09_P049596                                                               | sls       | sallimus                    | FBtr0072849 | sarcomere organization                  | 0,85 | 0,50 | 1,71 | 1,06 |
| A_09_P056531                                                               | Obp57a    | Odorant-binding protein 57a | FBtr0086294 | sensory perception of chemical stimulus | 0,55 | 0,50 | 0,58 | 0,70 |
| A_09_P116830                                                               | nrm       | neuromusculin               | FBtr0304833 | synaptic target recognition             | 0,58 | 0,50 | 1,01 | 0,94 |
| A_09_P003751                                                               | CG34324   | -                           | FBtr0112526 | chitin metabolic process                | 0,68 | 0,50 | 0,87 | 0,71 |

Table S3: List of genes induced and repressed in *die* compared to WT flies during SINV infection.Table S3: List of genes induced and repressed in *die*<sup>1</sup> compared to WT flies during SINV infection. Genes that are also induced by SINV are highlighted.

| Probe number                                                                    | SYMBOL    | Gene Name                                           | Flybase ID  | GO_Biological Process                         | <i>die</i> <sup>1</sup> /WT SINV | <i>die</i> <sup>1</sup> /WT non infected | <i>die</i> <sup>1</sup> SINV/Non infected | WT SINV/non infected |
|---------------------------------------------------------------------------------|-----------|-----------------------------------------------------|-------------|-----------------------------------------------|----------------------------------|------------------------------------------|-------------------------------------------|----------------------|
| <b>Induced (&gt;2 fold) in <i>die</i><sup>1</sup> compared to WT flies SINV</b> |           |                                                     |             |                                               |                                  |                                          |                                           |                      |
| A_09_P040931                                                                    | CG1304    | -                                                   | FBgn0031141 | proteolysis                                   | 52,68                            | 48,76                                    | 1,20                                      | 1,11                 |
| A_09_P134045                                                                    | Cyp12d1-d | Cyp12d1-d                                           | FBgn0053503 | oxidation-reduction process                   | 46,00                            | 55,60                                    | 0,93                                      | 1,13                 |
| A_09_P005646                                                                    | Cyp4p2    | Cyp4p2                                              | FBgn0033395 | oxidation-reduction process                   | 43,42                            | 45,42                                    | 1,20                                      | 1,26                 |
| A_09_P028156                                                                    | CG13905   | -                                                   | FBgn0035176 | -                                             | 28,72                            | 51,47                                    | 0,98                                      | 1,75                 |
| A_09_P129245                                                                    | CG16762   | -                                                   | FBgn0035343 | -                                             | 18,97                            | 14,34                                    | 0,96                                      | 0,72                 |
| A_09_P194370                                                                    | CG43089   | -                                                   | FPtr0304872 | ubiquitin-dependent protein catabolic process | 14,48                            | 18,29                                    | 0,77                                      | 0,97                 |
| A_09_P060946                                                                    | CG7567    | -                                                   | FBgn0039670 | -                                             | 11,82                            | 19,03                                    | 0,98                                      | 1,57                 |
| A_09_P045891                                                                    | DptB      | Diptericin B                                        | FBtr0086621 | antimicrobial humoral response                | 10,36                            | 4,79                                     | 6,36                                      | 2,94                 |
| A_09_P029476                                                                    | Ser6      | Serine protease 6                                   | FBgn0011834 | proteolysis                                   | 9,55                             | 8,55                                     | 1,25                                      | 1,12                 |
| A_09_P101215                                                                    | edin      | elevated during infection                           | FBtr0075174 | immune response                               | 9,03                             | 1,88                                     | 16,15                                     | 3,36                 |
| A_09_P010311                                                                    | Dpt       | Diptericin                                          | FBtr0086620 | antibacterial humoral response                | 7,87                             | 2,42                                     | 6,79                                      | 2,09                 |
| A_09_P129495                                                                    | CG7912    | -                                                   | FBgn0039736 | sulfate transport                             | 7,67                             | 6,41                                     | 0,99                                      | 0,83                 |
| A_09_P019026                                                                    | Sr-CIV    | Scavenger receptor class C, type IV                 | FBgn0031547 | defense response                              | 6,86                             | 6,60                                     | 1,21                                      | 1,17                 |
| A_09_P030406                                                                    | Mtk       | Metchnikowin                                        | FPtr0087386 | antimicrobial humoral response                | 6,17                             | 4,02                                     | 4,70                                      | 3,06                 |
| A_09_P112030                                                                    | CG10140   | -                                                   | FBgn0036363 | chitin metabolic process                      | 5,61                             | 7,60                                     | 0,91                                      | 1,24                 |
| A_09_P041636                                                                    | CecC      | Cecropin C                                          | FBtr0085616 | antibacterial humoral response                | 5,48                             | 4,33                                     | 2,38                                      | 1,89                 |
| A_09_P029506                                                                    | AttA      | Attacin-A                                           | FPtr0087437 | antimicrobial humoral response                | 5,39                             | 1,73                                     | 7,82                                      | 2,51                 |
| A_09_P012351                                                                    | Def       | Defensin                                            | FBtr0088432 | antibacterial humoral response                | 5,24                             | 3,56                                     | 1,80                                      | 1,22                 |
| A_09_P030936                                                                    | veg       | vegetable                                           | FBgn0265195 | peripheral nervous system development         | 4,95                             | 4,79                                     | 1,01                                      | 0,98                 |
| A_09_P197010                                                                    | CG34391   | -                                                   | FBgn0085420 | -                                             | 4,91                             | 5,21                                     | 0,82                                      | 0,87                 |
| A_09_P027001                                                                    | CG10332   | -                                                   | FPtr0072109 | -                                             | 4,82                             | 2,76                                     | 5,39                                      | 3,08                 |
| A_09_P064281                                                                    | AttC      | Attacin-C                                           | FPtr0305795 | antibacterial humoral response                | 4,77                             | 1,94                                     | 5,82                                      | 2,37                 |
| A_09_P064286                                                                    | AttB      | Attacin-B                                           | FPtr0087438 | antibacterial humoral response                | 4,73                             | 1,85                                     | 5,27                                      | 2,06                 |
| A_09_P056566                                                                    | PGRP-SB1  | PGRP-SB1                                            | FBtr0075348 | immune response                               | 4,57                             | 3,80                                     | 4,60                                      | 3,83                 |
| A_09_P007126                                                                    | CG13324   | -                                                   | FBgn0033789 | -                                             | 4,00                             | 4,90                                     | 1,08                                      | 1,32                 |
| A_09_P056576                                                                    | CG8147    | -                                                   | FBgn0043791 | metabolic process                             | 3,76                             | 3,10                                     | 0,94                                      | 0,78                 |
| A_09_P059486                                                                    | CG31272   | -                                                   | FBgn0051272 | transport                                     | 3,63                             | 2,90                                     | 1,06                                      | 0,85                 |
| A_09_P168525                                                                    | phr       | photorepair                                         | FBgn0030382 | DNA repair                                    | 3,60                             | 2,87                                     | 1,11                                      | 0,88                 |
| A_09_P076236                                                                    | AttD      | Attacin-D                                           | FPtr0083470 | antibacterial humoral response                | 3,39                             | 2,52                                     | 2,93                                      | 2,18                 |
| A_09_P113770                                                                    | CG12780   | -                                                   | FBgn0033301 | defense response to virus                     | 3,28                             | 3,92                                     | 0,87                                      | 1,05                 |
| A_09_P015226                                                                    | CG32302   | -                                                   | FPtr0072881 | chitin metabolic process                      | 3,26                             | 1,30                                     | 1,25                                      | 0,50                 |
| A_09_P017326                                                                    | CG33258   | -                                                   | FBgn0053258 | chitin metabolic process                      | 3,24                             | 2,50                                     | 1,19                                      | 0,92                 |
| A_09_P007351                                                                    | CG42807   | -                                                   | FBgn0261989 | -                                             | 3,08                             | 5,48                                     | 1,26                                      | 2,24                 |
| A_09_P219460                                                                    | CecA2     | Cecropin A2                                         | FPtr0085614 | antibacterial humoral response                | 3,04                             | 1,29                                     | 4,32                                      | 1,82                 |
| A_09_P019926                                                                    | CG9498    | -                                                   | FPtr0079282 | -                                             | 2,99                             | 1,94                                     | 1,66                                      | 1,07                 |
| A_09_P064591                                                                    | CG18853   | -                                                   | FBgn0042173 | DNA repair                                    | 2,98                             | 2,56                                     | 0,96                                      | 0,83                 |
| A_09_P180200                                                                    | CG13795   | -                                                   | FPtr0300709 | neurotransmitter transport                    | 2,97                             | 2,87                                     | 1,63                                      | 1,57                 |
| A_09_P053661                                                                    | PGRP-SD   | PGRP-SD                                             | FPtr0076807 | defense response to Gram-positive bacterium   | 2,05                             | 2,41                                     | 2,95                                      | 3,47                 |
| A_09_P048671                                                                    | spn-F     | spn-F                                               | FBgn0086362 | oocyte microtubule cytoskeleton organization  | 2,95                             | 2,70                                     | 1,03                                      | 0,94                 |
| A_09_P075531                                                                    | CG5399    | -                                                   | FBgn0038353 | -                                             | 2,91                             | 3,05                                     | 0,93                                      | 0,98                 |
| A_09_P000871                                                                    | CG33965   | -                                                   | FBgn0053965 | transport                                     | 2,86                             | 3,08                                     | 0,90                                      | 0,97                 |
| A_09_P018931                                                                    | CG8837    | -                                                   | FBgn0031520 | transmembrane transport                       | 2,84                             | 3,01                                     | 0,99                                      | 1,05                 |
| A_09_P042021                                                                    | Cyp6a2    | Cytochrome P450-6a2                                 | FBgn0000473 | oxidation-reduction process                   | 2,81                             | 2,87                                     | 1,01                                      | 1,03                 |
| A_09_P006576                                                                    | Damm      | Death associated molecule related to Mch2 caspase   | FBgn0033659 | programmed cell death                         | 2,74                             | 2,44                                     | 0,98                                      | 0,87                 |
| A_09_P113810                                                                    | GstE10    | Glutathione S transferase E10                       | FBgn0063499 | glutathione metabolic process                 | 2,74                             | 3,24                                     | 0,81                                      | 0,96                 |
| A_09_P053051                                                                    | Tektin-C  | Tektin C                                            | FBgn0035638 | microtubule-based process                     | 2,72                             | 2,10                                     | 0,99                                      | 0,76                 |
| A_09_P063516                                                                    | CG13177   | -                                                   | FBgn0040759 | -                                             | 2,72                             | 3,07                                     | 1,29                                      | 1,46                 |
| A_09_P035761                                                                    | CG11425   | -                                                   | FBgn0037167 | dephosphorylation                             | 2,71                             | 2,78                                     | 1,31                                      | 1,34                 |
| A_09_P045121                                                                    | sls       | sallimus                                            | FBgn0086906 | regulation of hemocyte proliferation          | 2,57                             | 3,77                                     | 0,60                                      | 0,88                 |
| A_09_P016591                                                                    | Dh31-R    | Diuretic hormone 31 Receptor                        | FBgn0052843 | G-protein coupled receptor signaling pathway  | 2,54                             | 2,65                                     | 0,92                                      | 0,97                 |
| A_09_P026381                                                                    | Alp2      | Alkaline phosphatase 2                              | FPtr0071782 | dephosphorylation                             | 2,52                             | 1,84                                     | 1,03                                      | 0,75                 |
| A_09_P079516                                                                    | rgn       | regeneration                                        | FBgn0261258 | tissue regeneration                           | 2,49                             | 3,21                                     | 0,82                                      | 1,06                 |
| A_09_P074121                                                                    | Ect3      | Ectoderm-expressed 3                                | FPtr0082487 | autophagic cell death                         | 2,48                             | 1,51                                     | 2,38                                      | 1,45                 |
| A_09_P036976                                                                    | CG14606   | -                                                   | FPtr0081603 | phagocytosis                                  | 2,47                             | 1,70                                     | 1,21                                      | 0,84                 |
| A_09_P026396                                                                    | Oatp58Db  | Organic anion transporting polypeptide 58Db         | FPtr0071778 | organic anion transport                       | 2,46                             | 1,77                                     | 1,02                                      | 0,73                 |
| A_09_P014056                                                                    | Mur29B    | Mucin related 29B                                   | FBgn0051901 | -                                             | 2,45                             | 2,34                                     | 1,23                                      | 1,18                 |
| A_09_P050506                                                                    | CG15282   | -                                                   | FBgn0028855 | -                                             | 2,44                             | 2,13                                     | 1,51                                      | 1,32                 |
| A_09_P043361                                                                    | Lsp1alpha | Larval serum protein 1 alpha                        | FBgn0002562 | -                                             | 2,43                             | 2,34                                     | 1,13                                      | 1,10                 |
| A_09_P028636                                                                    | CG1139    | -                                                   | FBgn0035300 | growth                                        | 2,37                             | 2,81                                     | 0,95                                      | 1,13                 |
| A_09_P128930                                                                    | CG13075   | -                                                   | FBgn0036563 | chitin metabolic process                      | 2,37                             | 2,28                                     | 1,37                                      | 1,31                 |
| A_09_P003596                                                                    | CG34284   | -                                                   | FBgn0085313 | -                                             | 2,37                             | 2,86                                     | 0,90                                      | 1,09                 |
| A_09_P121465                                                                    | Pvf2      | PDGF- and VEGF-related factor 2                     | FBgn0031888 | hemocyte migration                            | 2,33                             | 2,51                                     | 1,32                                      | 1,42                 |
| A_09_P035511                                                                    | CapaR     | Capability receptor                                 | FBgn0037100 | neuropeptide signaling pathway                | 2,32                             | 2,13                                     | 1,04                                      | 0,96                 |
| A_09_P114005                                                                    | CG33109   | -                                                   | FPtr0082900 | -                                             | 2,29                             | 1,87                                     | 1,30                                      | 1,07                 |
| A_09_P069016                                                                    | CG14292   | -                                                   | FBgn0038658 | -                                             | 2,29                             | 2,33                                     | 0,99                                      | 1,01                 |
| A_09_P008901                                                                    | CG18635   | -                                                   | FBgn0034279 | -                                             | 2,27                             | 2,22                                     | 1,05                                      | 1,02                 |
| A_09_P052846                                                                    | CG13704   | -                                                   | FBgn0035583 | -                                             | 2,27                             | 2,58                                     | 0,96                                      | 1,09                 |
| A_09_P043391                                                                    | Mal-A2    | Maltase A2                                          | FPtr0088747 | carbohydrate metabolic process                | 2,24                             | 1,74                                     | 1,25                                      | 0,97                 |
| A_09_P075741                                                                    | Zip89B    | Zinc/iron regulated transporter-related protein 89B | FBgn0038412 | metal ion transport                           | 2,23                             | 2,12                                     | 1,20                                      | 1,14                 |



**Table S3: List of genes induced and repressed in *die1* compared to WT flies during SINV infection.**

|              |               |                                               |             |                                                        |      |      |      |      |
|--------------|---------------|-----------------------------------------------|-------------|--------------------------------------------------------|------|------|------|------|
| A_09_P078261 | prominin-like | prominin-like                                 | FBgn0026189 | neuron projection morphogenesis                        | 2,23 | 2,55 | 0,97 | 1,11 |
| A_09_P064786 | MESK4         | Misexpression suppressor of KSR 4             | FBgn0043069 | positive regulation of Ras protein signal transduction | 2,23 | 2,44 | 0,99 | 1,08 |
| A_09_P189326 | CR41606       | -                                             | FBtr0114204 | -                                                      | 2,20 | 2,69 | 0,79 | 0,97 |
| A_09_P021191 | CG13117       | -                                             | FBtr0079864 | -                                                      | 2,20 | 2,79 | 1,05 | 1,33 |
| A_09_P118470 | Dgp-1         | Dgp-1                                         | FBtr0086773 | -                                                      | 2,20 | 2,01 | 1,03 | 0,94 |
| A_09_P049331 | Chp53E        | Calbindin 53E                                 | FBtr0087056 | active regulation of response to wound                 | 2,18 | 1,90 | 1,00 | 0,87 |
| A_09_P195390 | A2bp1         | Ataxin-2 binding protein 1                    | FBgn0052062 | oogenesis                                              | 2,18 | 3,41 | 0,85 | 1,33 |
| A_09_P073381 | CG5361        | -                                             | FBtr0082201 | metabolic process                                      | 2,17 | 1,68 | 1,17 | 0,91 |
| A_09_P061546 | CG15553       | -                                             | FBtr0290201 | transmembrane transport                                | 2,16 | 1,49 | 2,78 | 1,91 |
| A_09_P100315 | CG34269       | -                                             | FBtr0112464 | -                                                      | 2,16 | 1,88 | 0,94 | 0,82 |
| A_09_P018246 | CG42329       | -                                             | FBtr0299796 | -                                                      | 2,13 | 2,26 | 0,92 | 0,98 |
| A_09_P024961 | CG14764       | -                                             | FBgn0033236 | -                                                      | 2,13 | 2,21 | 1,03 | 1,07 |
| A_09_P034006 | CG7589        | -                                             | FBtr0075221 | phagocytosis                                           | 2,11 | 1,80 | 0,95 | 0,82 |
| A_09_P007121 | CG13323       | -                                             | FBgn0033788 | -                                                      | 2,10 | 2,50 | 1,05 | 1,25 |
| A_09_P108115 | Arpc3B        | Actin-related protein 2/3 complex, subunit 3B | FBgn0065032 | actin filament organization                            | 2,10 | 2,45 | 0,91 | 1,06 |
| A_09_P180030 | CG11334       | -4                                            | FBtr0085808 | wing disc development                                  | 2,09 | 1,64 | 1,31 | 1,02 |
| A_09_P026401 | Oatp58Dc      | Organic anion transporting polypeptide 58Dc   | FBtr0071777 | response to methotrexate                               | 2,09 | 1,73 | 0,96 | 0,80 |
| A_09_P02691  | CG17672       | -                                             | FBtr0110982 | -                                                      | 2,09 | 1,94 | 1,00 | 0,93 |
| A_09_P020306 | Ndae1         | Na+-driven anion exchanger                    | FBtr0299538 | anion transport                                        | 2,08 | 1,68 | 1,27 | 1,03 |
| A_09_P061746 | salt          | salty dog                                     | FBtr0300915 | transmembrane transport                                | 2,08 | 1,41 | 1,26 | 0,86 |
| A_09_P019071 | CG3604        | -                                             | FBtr0077545 | -                                                      | 2,07 | 1,85 | 1,29 | 1,15 |
| A_09_P042786 | Hsp22         | Heat shock protein 22                         | FBgn0001223 | response to heat                                       | 2,07 | 2,65 | 0,74 | 0,94 |
| A_09_P007136 | CG13325       | -                                             | FBtr0087722 | -                                                      | 2,07 | 1,76 | 1,73 | 1,47 |
| A_09_P194406 | Tsp2A         | Tetraspanin 2A                                | FBgn0024361 | -                                                      | 2,06 | 2,60 | 0,90 | 1,14 |
| A_09_P039921 | CG15814       | -                                             | FBgn0030873 | -                                                      | 2,05 | 2,27 | 0,97 | 1,07 |
| A_09_P210360 | CG32024       | -                                             | FBtr0076580 | chitin metabolic process                               | 2,02 | 2,44 | 0,84 | 1,02 |
| A_09_P146530 | CG15210       | -                                             | FBgn0040850 | -                                                      | 2,01 | 2,58 | 1,02 | 1,30 |
| A_09_P218200 | CG5527        | -                                             | FBtr0085255 | proteolysis                                            | 2,01 | 1,26 | 1,65 | 1,03 |
| A_09_P126515 | PGRP-LD       | Peptidoglycan recognition protein LD          | FBtr0091709 | immune response                                        | 2,00 | 1,63 | 1,12 | 0,91 |
| A_09_P027951 | mthl9         | methuselah-like 9                             | FBtr0072574 | G-protein coupled receptor signaling pathway           | 2,00 | 1,93 | 1,15 | 1,11 |
| A_09_P040116 | CG15043       | -                                             | FBtr0074626 | -                                                      | 2,00 | 2,72 | 0,86 | 1,17 |
| A_09_P008051 | CG8249        | -                                             | FBtr0087310 | -                                                      | 2,00 | 1,46 | 1,22 | 0,89 |
| A_09_P058261 | CG30380       | -                                             | FBgn0050380 | -                                                      | 1,99 | 2,08 | 1,17 | 1,22 |

| Repressed ( $\geq 2$ fold) in <i>die1</i> compared to WT flies SINV |            |                                             |             |                                                                         |      |      |      |        |
|---------------------------------------------------------------------|------------|---------------------------------------------|-------------|-------------------------------------------------------------------------|------|------|------|--------|
| A_09_P060926                                                        | die        | Diedel                                      | FBtr0085426 | response to bacterium                                                   | 0,00 | 0,11 | 0,99 | 323,47 |
| A_09_P062366                                                        | lectin-28C | lectin-28C                                  | FBtr0079527 | -                                                                       | 0,07 | 0,07 | 2,59 | 2,39   |
| A_09_P043321                                                        | Lcp1       | Larval cuticle protein 1                    | FBtr0088763 | chitin-based cuticle development                                        | 0,07 | 0,11 | 0,63 | 0,98   |
| A_09_P060921                                                        | CG2310     | -                                           | FBtr0085434 | -                                                                       | 0,08 | 0,11 | 1,05 | 1,52   |
| A_09_P217215                                                        | CG14957    | -                                           | FBtr0073038 | chitin metabolic process                                                | 0,09 | 0,19 | 0,79 | 1,68   |
| A_09_P032116                                                        | sfl        | sulfateless                                 | FBtr0076968 | Wnt signaling pathway                                                   | 0,16 | 0,17 | 1,00 | 1,05   |
| A_09_P038731                                                        | CG14410    | -                                           | FBtr0073948 | -                                                                       | 0,16 | 0,16 | 1,15 | 1,13   |
| A_09_P042926                                                        | Jon44E     | Jonah 44E                                   | FBtr0088704 | proteolysis                                                             | 0,18 | 0,20 | 0,96 | 1,11   |
| A_09_P028306                                                        | CG12090    | -                                           | FBtr0072703 | -                                                                       | 0,17 | 0,20 | 0,94 | 1,08   |
| A_09_P078756                                                        | Fie        | Fire exit                                   | FBtr0073157 | -                                                                       | 0,19 | 0,20 | 0,97 | 1,02   |
| A_09_P020981                                                        | CG9515     | -                                           | FBtr0079791 | -                                                                       | 0,19 | 0,21 | 1,27 | 1,40   |
| A_09_P010541                                                        | LysB       | Lysozyme B                                  | FBtr0072628 | antimicrobial humoral response                                          | 0,22 | 0,26 | 0,78 | 0,93   |
| A_09_P022396                                                        | Vha68-3    | Vacuolar H+ ATPase 68kD subunit 3           | FBtr0080421 | ATP metabolic process                                                   | 0,22 | 0,17 | 0,85 | 0,64   |
| A_09_P147255                                                        | CG4398     | -                                           | FBtr0087157 | -                                                                       | 0,20 | 0,15 | 1,87 | 1,41   |
| A_09_P192645                                                        | CG42847    | -                                           | FBtr0303932 | -                                                                       | 0,22 | 0,19 | 0,87 | 0,75   |
| A_09_P072161                                                        | CG17192    | -                                           | FBtr0085153 | lipid catabolic process                                                 | 0,24 | 0,14 | 1,27 | 0,74   |
| A_09_P018296                                                        | CG10869    | -                                           | FBtr0077917 | -                                                                       | 0,25 | 0,10 | 1,34 | 0,54   |
| A_09_P053136                                                        | Jon65Aii   | Jonah 65Aii                                 | FBtr0077042 | proteolysis                                                             | 0,25 | 0,37 | 0,64 | 0,94   |
| A_09_P058781                                                        | CG31030    | -                                           | FBtr0085579 | ATP hydrolysis coupled proton transport                                 | 0,29 | 0,26 | 0,98 | 0,88   |
| A_09_P015131                                                        | CG32267    | -                                           | FBtr0073142 | -                                                                       | 0,30 | 0,32 | 0,99 | 1,06   |
| A_09_P143990                                                        | CG9531     | -                                           | FBtr0079270 | protein methylation                                                     | 0,32 | 0,33 | 0,98 | 1,01   |
| A_09_P030671                                                        | Rala       | Ras-like protein A                          | FBtr0070583 | innate immune response                                                  | 0,31 | 0,34 | 1,03 | 1,13   |
| A_09_P028151                                                        | CG13907    | -                                           | FBtr0072593 | transmembrane transport                                                 | 0,32 | 0,30 | 1,10 | 1,02   |
| A_09_P063696                                                        | CG15213    | -                                           | FBtr0077182 | -                                                                       | 0,33 | 0,41 | 0,85 | 1,07   |
| A_09_P006826                                                        | CG13155    | -                                           | FBtr0087956 | -                                                                       | 0,33 | 0,39 | 1,15 | 1,35   |
| A_09_P008251                                                        | Tsf3       | Transferrin 3                               | FBtr0087130 | response to bacterium                                                   | 0,34 | 0,36 | 1,40 | 1,48   |
| A_09_P111285                                                        | CG9259     | -                                           | FBtr0081464 | -                                                                       | 0,34 | 0,30 | 1,02 | 0,88   |
| A_09_P149115                                                        | RpL17      | Ribosomal protein L17                       | FBtr0070982 | mitotic spindle organization                                            | 0,35 | 0,38 | 1,01 | 1,11   |
| A_09_P074191                                                        | CG4830     | -                                           | FBtr0082625 | metabolic process                                                       | 0,35 | 0,19 | 0,95 | 0,51   |
| A_09_P140170                                                        | ND-B14     | NADH dehydrogenase (ubiquinone) B14 subunit | FBtr0088238 | mitochondrial electron transport, NADH to ubiquinone                    | 0,36 | 0,43 | 0,91 | 1,09   |
| A_09_P052171                                                        | Cyp4e3     | Cytochrome P450-4e3                         | FBtr0079925 | oxidation-reduction process                                             | 0,36 | 0,58 | 1,65 | 2,64   |
| A_09_P058216                                                        | CG30371    | -                                           | FBtr0088798 | proteolysis                                                             | 0,37 | 0,46 | 0,92 | 1,14   |
| A_09_P025106                                                        | CG14759    | -                                           | FBtr0088796 | -                                                                       | 0,39 | 0,47 | 0,72 | 0,88   |
| A_09_P020401                                                        | Cyp4d21    | Cyp4d21                                     | FBtr0079471 | oxidation-reduction process                                             | 0,39 | 0,29 | 1,39 | 1,04   |
| A_09_P025456                                                        | CG15120    | -                                           | FBtr0086463 | -                                                                       | 0,40 | 0,52 | 1,19 | 1,55   |
| A_09_P053151                                                        | CG10472    | -                                           | FBtr0077066 | proteolysis                                                             | 0,40 | 0,44 | 0,70 | 0,78   |
| A_09_P060931                                                        | CG2010     | -                                           | FBtr0085427 | SCF-dependent proteasomal ubiquitin-dependent protein catabolic process | 0,41 | 0,47 | 0,90 | 1,04   |
| A_09_P013876                                                        | CG31832    | -                                           | FBtr0080726 | -                                                                       | 0,42 | 0,58 | 2,91 | 4,06   |
| A_09_P032651                                                        | Jon25Bi    | Jonah 25Bi                                  | FBtr0079054 | proteolysis                                                             | 0,42 | 0,32 | 1,23 | 0,93   |
| A_09_P025161                                                        | Mal-A4     | Maltase A4                                  | FBtr0088748 | carbohydrate metabolic process                                          | 0,42 | 0,70 | 1,42 | 2,38   |
| A_09_P196520                                                        | CG42540    | -                                           | FBtr0301097 | -                                                                       | 0,42 | 0,42 | 0,94 | 0,95   |
| A_09_P063456                                                        | CG16926    | -                                           | FBtr0086499 | -                                                                       | 0,42 | 0,54 | 0,90 | 1,16   |
| A_09_P007686                                                        | Oaz        | O/E-associated zinc finger protein          | FBtr0302927 | spiracle morphogenesis, open tracheal system                            | 0,41 | 0,34 | 0,67 | 0,56   |
| A_09_P015161                                                        | CG32278    | -                                           | FBtr0073033 | -                                                                       | 0,43 | 0,42 | 1,06 | 1,04   |

Table S3: List of genes induced and repressed in *dfe* , compared to WT flies during SINV infection.

|              |            |                                       |             |                                               |      |      |      |      |
|--------------|------------|---------------------------------------|-------------|-----------------------------------------------|------|------|------|------|
| A_09_P062776 | CG3699     | -                                     | FBtr0070186 | fatty acid beta-oxidation                     | 0,43 | 0,85 | 1,01 | 2,01 |
| A_09_P071671 | CG5107     | -                                     | FBtr0084879 | -                                             | 0,43 | 0,60 | 0,58 | 0,79 |
| A_09_P060181 | CG31606    | -                                     | FBtr0079577 | -                                             | 0,43 | 0,55 | 2,10 | 2,67 |
| A_09_P024031 | CG17571    | -                                     | FBtr0081376 | proteolysis                                   | 0,44 | 0,73 | 0,70 | 1,15 |
| A_09_P061721 | CG11550    | -                                     | FBtr0085867 | -                                             | 0,44 | 0,37 | 1,07 | 0,88 |
| A_09_P028401 | CG13919    | -                                     | FBtr0072759 | -                                             | 0,45 | 0,58 | 1,01 | 1,32 |
| A_09_P007056 | CG12374    | -                                     | FBtr0087854 | proteolysis                                   | 0,44 | 0,37 | 0,74 | 0,63 |
| A_09_P209330 | LSm7       | -                                     | FBtr0080934 | neurogenesis                                  | 0,45 | 0,53 | 0,95 | 1,10 |
| A_09_P034876 | Ir76b      | Ionotropic receptor 76b               | FBtr0074869 | cellular response to salt                     | 0,49 | 0,35 | 0,75 | 0,54 |
| A_09_P053941 | Jon66Cii   | Jonah 66Cii                           | FBtr0076666 | proteolysis                                   | 0,46 | 0,57 | 0,86 | 1,08 |
| A_09_P063381 | CG14974    | -                                     | FBtr0073140 | -                                             | 0,46 | 0,53 | 0,78 | 0,90 |
| A_09_P148025 | FucTD      | FucTD                                 | FBtr0072693 | protein glycosylation                         | 0,46 | 0,36 | 0,99 | 0,77 |
| A_09_P064576 | CG18814    | -                                     | FBtr0075385 | oxidation-reduction process                   | 0,45 | 0,45 | 1,08 | 1,07 |
| A_09_P004316 | CG34417    | -                                     | FBtr0112704 | mesoderm development                          | 0,47 | 0,54 | 0,82 | 0,94 |
| A_09_P170880 | RhoGAP100F | Rho GTPase activating protein at 100F | FBtr0302181 | synaptic vesicle localization                 | 0,13 | 0,13 | 0,85 | 0,84 |
| A_09_P053566 | CG8560     | -                                     | FBtr0076868 | proteolysis                                   | 0,48 | 0,45 | 0,87 | 0,82 |
| A_09_P060291 | CG31639    | -                                     | FBtr0079208 | ubiquitin-dependent protein catabolic process | 0,48 | 0,64 | 0,67 | 0,89 |
| A_09_P030521 | Cyp4e1     | Cytochrome P450-4e1                   | FBtr0088746 | oxidation-reduction process                   | 0,48 | 0,42 | 1,07 | 0,94 |
| A_09_P063371 | CG12483    | -                                     | FBtr0072540 | -                                             | 0,49 | 0,76 | 0,61 | 0,95 |
| A_09_P017921 | CG11912    | -                                     | FBtr0078099 | proteolysis                                   | 0,49 | 1,18 | 0,78 | 1,87 |
| A_09_P061851 | Syt7       | Synaptotagmin 7                       | FBtr0089139 | exocytosis                                    | 0,50 | 0,44 | 1,11 | 0,95 |
| A_09_P061981 | Sox102F    | Sox102F                               | FBtr0100600 | positive regulation of heart contraction      | 0,50 | 0,47 | 1,38 | 1,30 |
| A_09_P109095 | CG16704    | -                                     | FBtr0077550 | -                                             | 0,50 | 0,78 | 1,21 | 1,89 |
| A_09_P027391 | mRpS17     | mitochondrial ribosomal protein S17   | FBtr0072277 | translation                                   | 0,50 | 0,58 | 1,02 | 1,20 |
| A_09_P007476 | DJ-1alpha  | DJ-1alpha                             | FBtr0087615 | response to oxidative stress                  | 0,50 | 0,48 | 0,92 | 0,88 |
| A_09_P029371 | Dsp1       | Dorsal switch protein 1               | FBgn0011764 | chromatin remodeling                          | 0,50 | 0,47 | 0,65 | 0,59 |
